# Supplementary material for: Bicarbonate signalling via G protein-coupled receptor regulates ischaemia-reperfusion injury
Source: PubMed Central journal article supplement (PMC10899177; doi:10.1038/s41467-024-45579-3), 2024-02-27

## Supplementary Information

### **Bicarbonate signalling via G protein-coupled receptor regulates ischaemia-reperfusion injury**

Airi Jo-Watanabe<sup>1,2\*</sup>, Toshiki Inaba<sup>3</sup>, Takahiro Osada<sup>4</sup>, Ryota Hashimoto<sup>5</sup>, Tomohiro Nishizawa<sup>6</sup>, Toshiaki Okuno<sup>1</sup>, Sayoko Ihara<sup>7</sup>, Kazushige Touhara<sup>7</sup>, Nobutaka Hattori<sup>3,8</sup>, Masatsugu Oh-Hora<sup>1,5</sup>, Osamu Nureki<sup>9</sup>, and Takehiko Yokomizo<sup>1\*</sup>

#### **Affiliations**

<sup>1</sup>Department of Biochemistry, Juntendo University Graduate School of Medicine, Tokyo 113-8421, Japan

<sup>2</sup>AMED-PRIME, Japan Agency for Medical Research and Development, Tokyo 100-0004, Japan

<sup>3</sup>Department of Neurology, Juntendo University School of Medicine, Tokyo 113-8421, Japan

<sup>4</sup>Department of Neurophysiology, Juntendo University School of Medicine, Tokyo 113-8421, Japan

<sup>5</sup>Laboratory of Cell Biology, Biomedical Research Core Facilities, Juntendo University Graduate School of Medicine, Tokyo 113-8421, Japan

<sup>6</sup>Graduate School of Medical Life Science, Yokohama City University, Kanagawa 230-0045, Japan

<sup>7</sup>Department of Applied Biological Chemistry, Graduate School of Agricultural and Life Sciences, The University of Tokyo, Tokyo 113-8657, Japan

<sup>8</sup>Neurodegenerative Disorders Collaborative Laboratory, RIKEN Center for Brain Science, Saitama 351-0198, Japan

<sup>9</sup>Department of Biological Sciences, Graduate School of Science, The University of Tokyo, Tokyo 113-0033, Japan

**\*Corresponding Authors:**

Airi Jo-Watanabe, MD, PhD

2-1-1 Hongo, Bunkyo-Ku, Tokyo 113-8421, Japan

E-mail: awatanabe-ky@umin.ac.jp

Takehiko Yokomizo, MD, PhD

2-1-1 Hongo, Bunkyo-Ku, Tokyo 113-8421, Japan

E-mail: yokomizo-ky@umin.ac.jp



## **Supplementary Figures**

# Supplementary Fig. 1

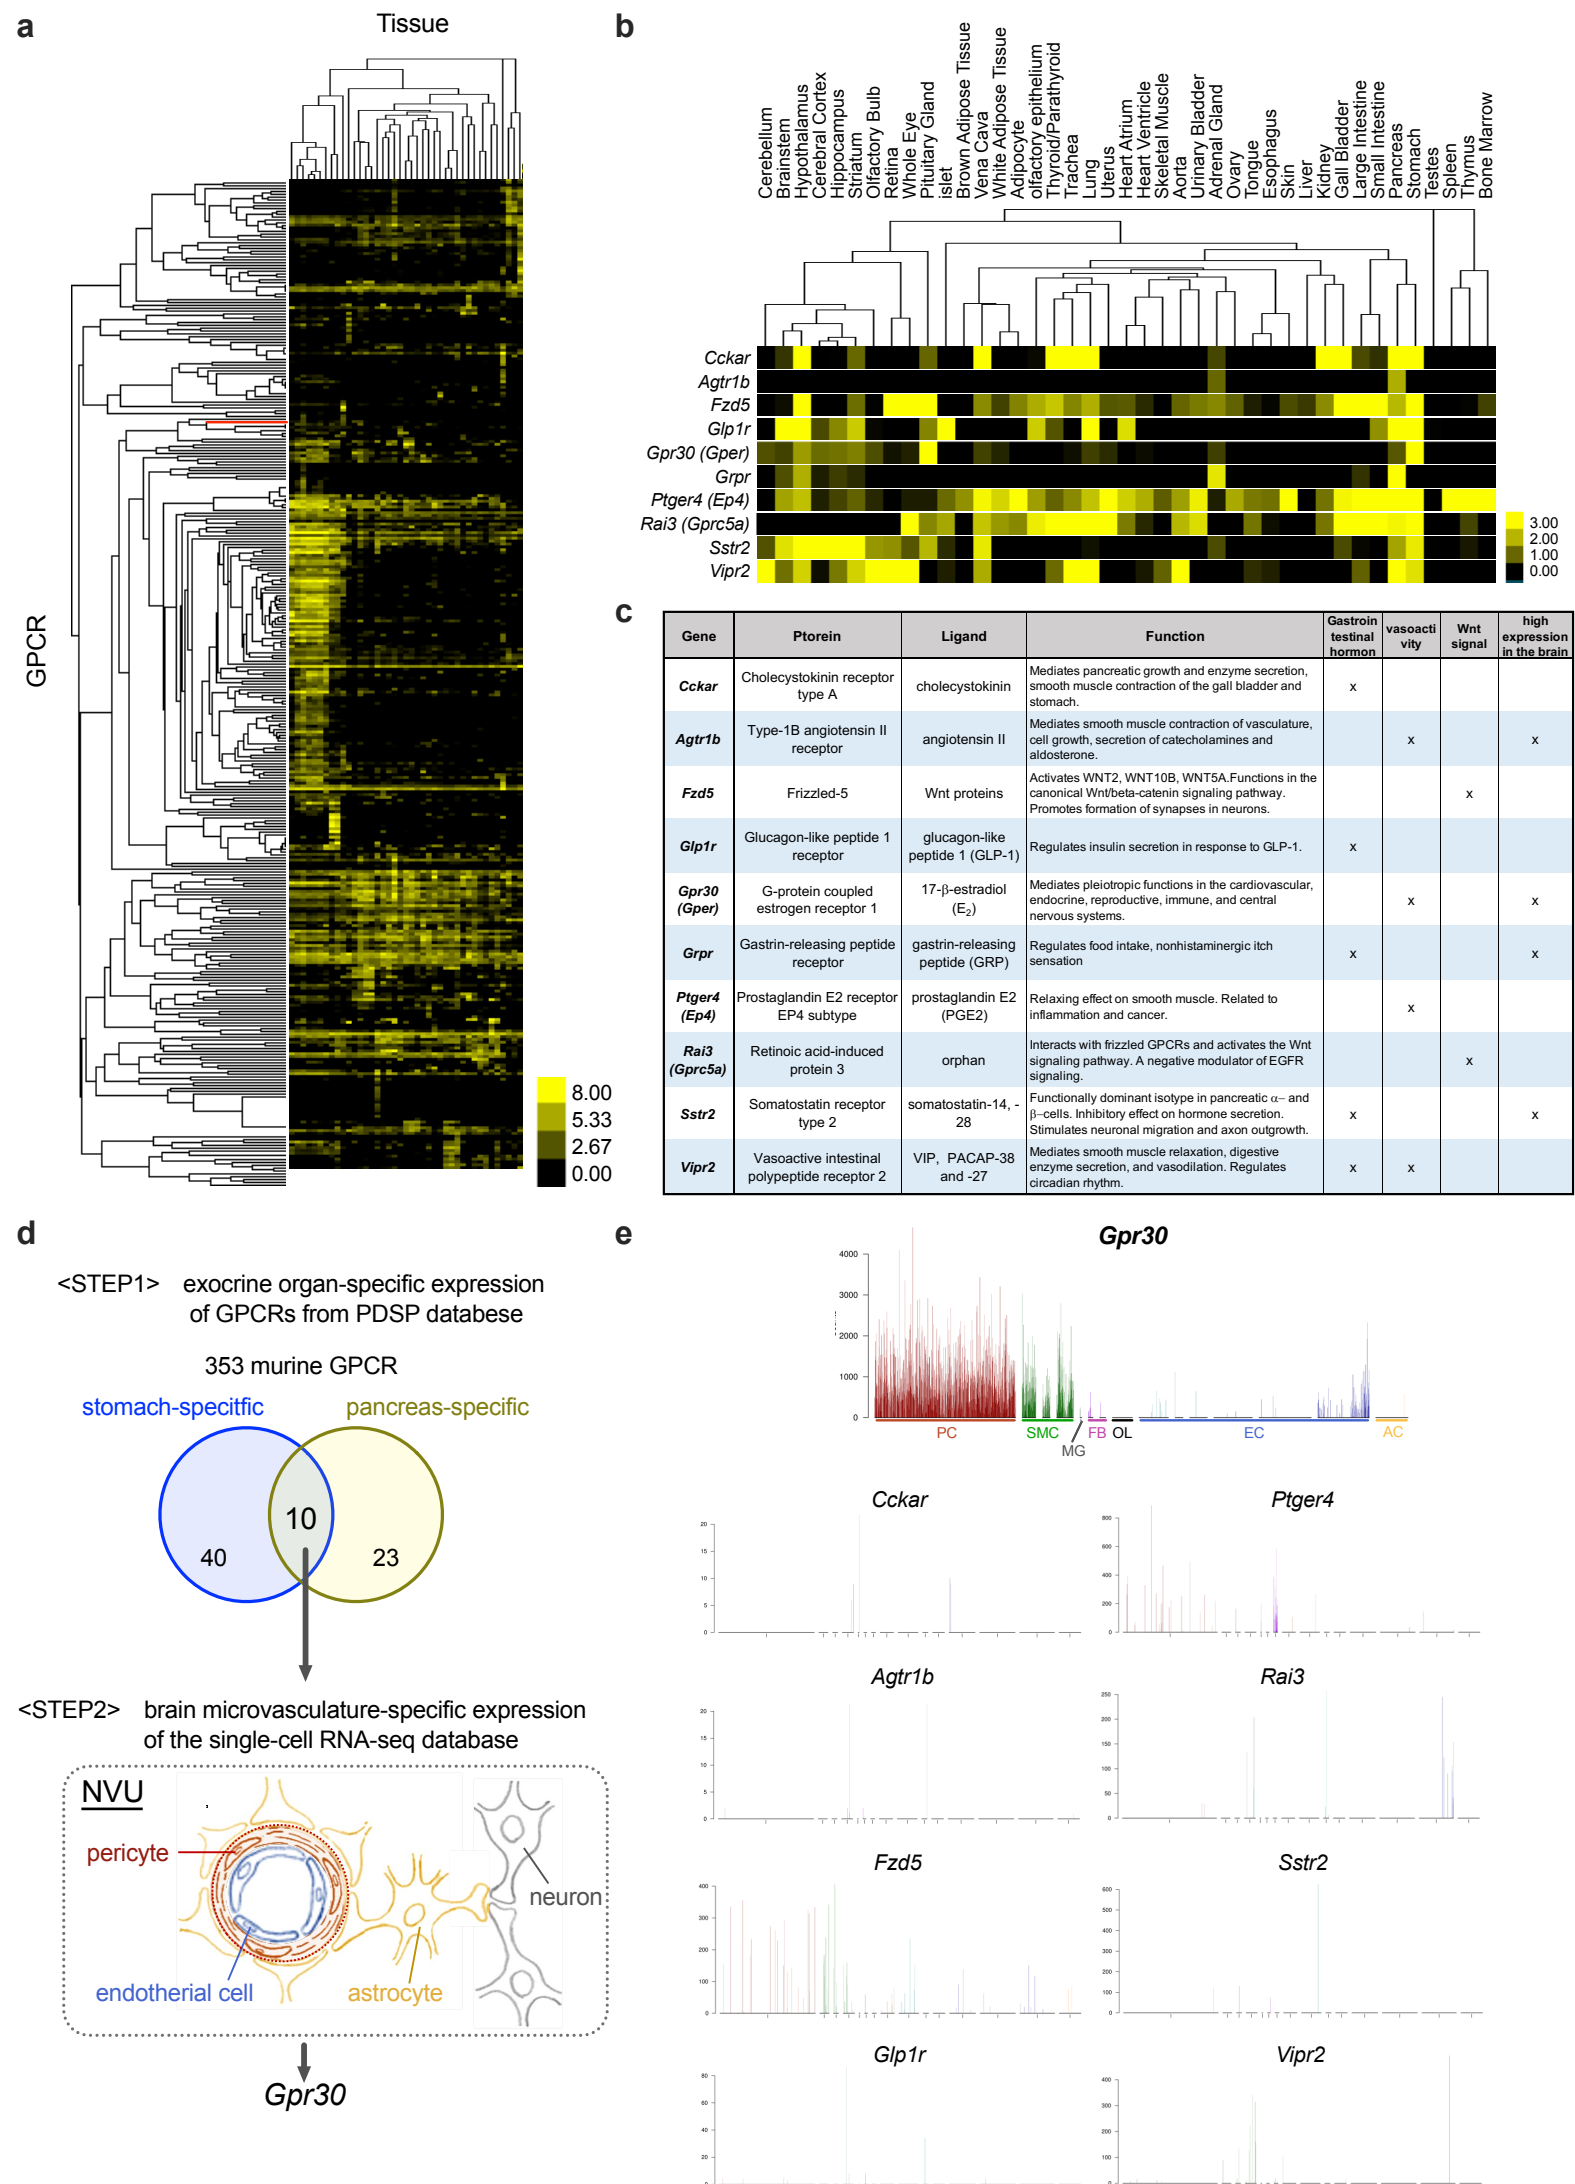

**Supplementary Fig. 1. Expression profiles of various GPCRs and GPR30 in mouse tissues.**

**a)** Public data from the PDSP database

(<https://pdsp.unc.edu/databases/ShawnCell/heatmaps.php>) that covers the expression of

353 murine GPCRs in various tissues. The red line represents GPR30. **b)** Candidate

GPCRs that are specifically expressed in the stomach and pancreas. **c)** Receptor

names, ligands, and characteristics of the 10 candidate GPCRs. ‘High expression in the brain’ indicates that the brain expresses a particular GPCR over the 10th highest

level among other tissues. **d)** Two-step selection of candidate GPCRs. Step 1: Of the

353 murine GPCRs, 50 and 33 were highly expressed in stomach and pancreas,

respectively. From these, 10 GPCRs that were commonly highly expressed in both

the tissues were selected as potential candidates. Among the 10 candidate GPCRs,

GPR30 was selected for the neurovascular unit (NVU) -specific expression in the

brain. **e)** Expression of each indicated candidate GPCR in single-cell components of

the NVU. PC, pericytes; SMC, smooth muscle cells; MG, microglia; FB, vascular fibroblast-like cells; OL, oligodendrocytes; EC, endothelial cells; AC, astrocytes.

Data were obtained from the single-cell RNA-sequencing database of mouse brain

vascular and perivascular cells

(<http://betsholtzlab.org/VascularSingleCells/database.html>).

# Supplementary Fig. 2

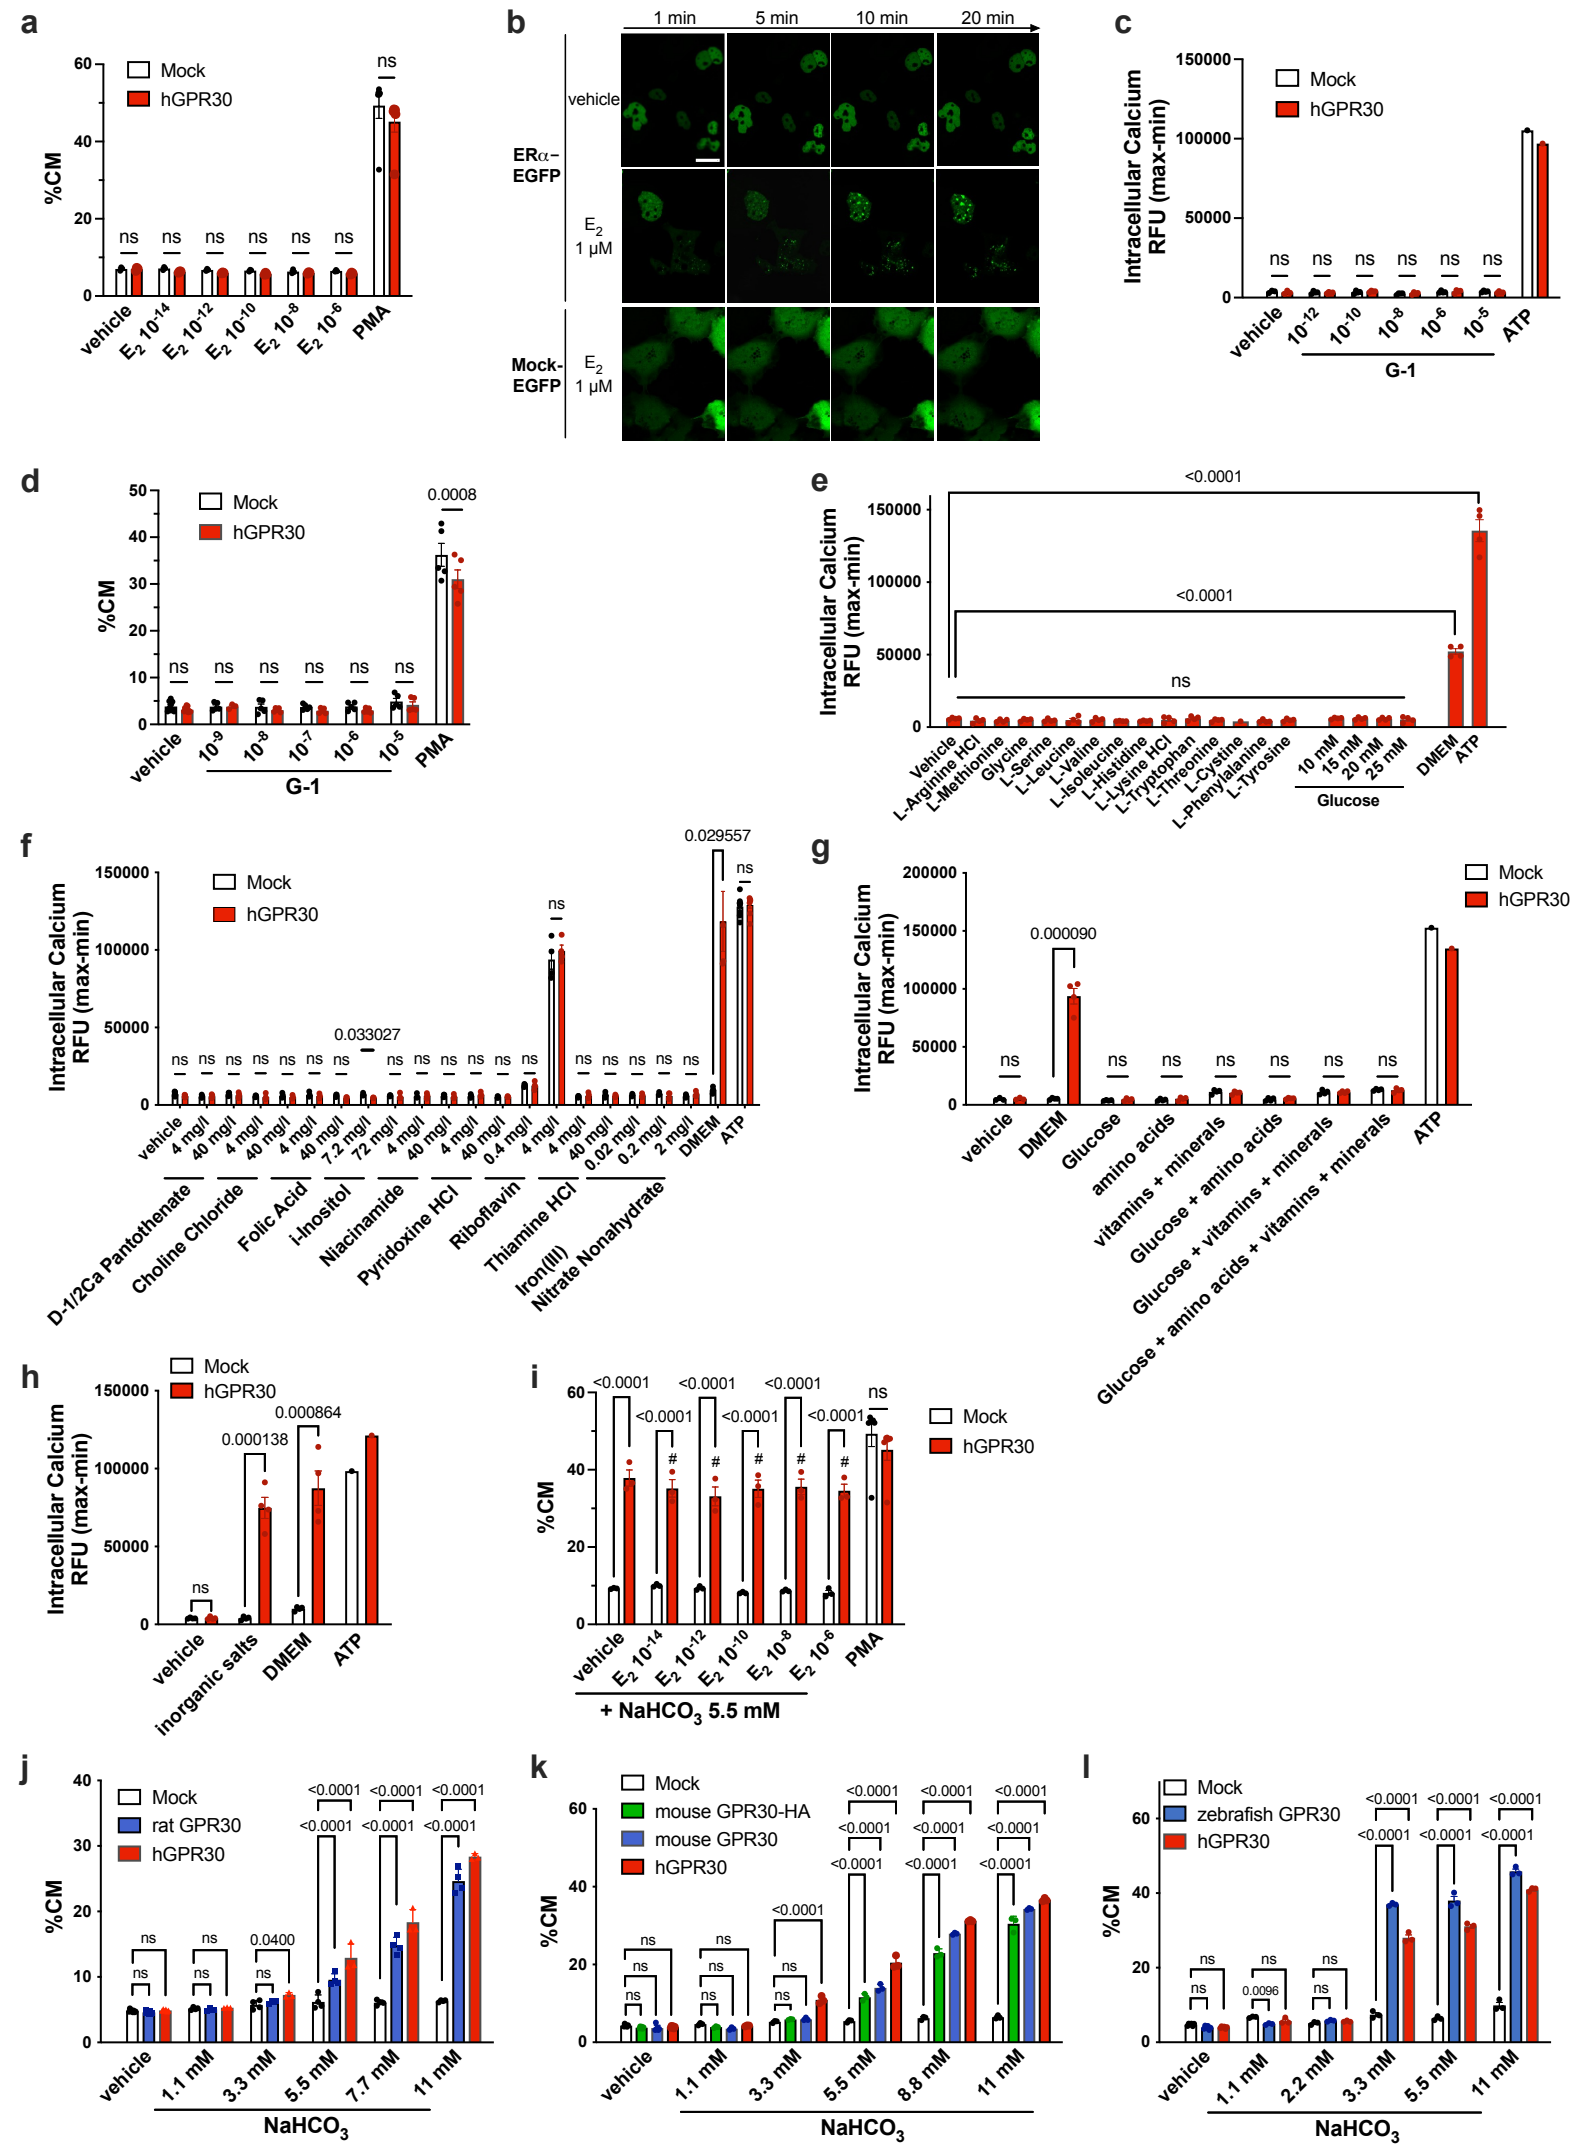

**Supplementary Fig. 2. Activation of GPR30 by bicarbonate ions.**

**a)** TGF $\alpha$  shedding assay using mock- and human GPR30 (hGPR30)-transfected HEK293 cells treated with oestradiol (E<sub>2</sub>). PMA (100 nM) was used as the positive control. **b)** E<sub>2</sub>-dependent accumulation of oestrogen receptor  $\alpha$  (ER $\alpha$ ). COS-7 cells expressing ER $\alpha$  fused with EGFP (ER $\alpha$ -EGFP) or mock-EGFP were treated with vehicle or E<sub>2</sub> (1  $\mu$ M) and examined using confocal microscopy. Mock-EGFP served as the negative control. Scale bar, 20  $\mu$ m. **c, d)** The calcium mobilization assay (**c**) and the TGF $\alpha$  shedding assay (**d**) using hGPR30-transfected HEK293 cells treated with a putative synthetic agonist, G-1. ATP (25  $\mu$ M) and PMA (100 nM) were used as positive controls. **e–h)** Inorganic components of DMEM activate hGPR30. Amino acids and glucose (**e**), vitamins, and trace elements (**f**) in DMEM, and their combination (**g**) did not induce calcium mobilization in MCF-GPR30. A mixed solution of the inorganic components of Dulbecco's modified Eagle's medium (DMEM) elevated intracellular calcium (**h**). **i)** hGPR30-transfected HEK293 cells were treated with 5.5 mM sodium bicarbonate and the indicated concentrations of E<sub>2</sub> in the TGF $\alpha$  shedding assay. **j–l)** TGF $\alpha$  shedding assay using HEK293 cells transfected with rat (**j**), mouse (**k**), and zebrafish (**l**) GPR30, and treated with physiological concentrations of bicarbonate ions. Statistical analysis: two-tailed unpaired t-test with Bonferroni's correction after two-way ANOVA (**a, c, d, i–l**). In **i**, # indicates no significant difference compared with the hGPR30 column treated with the vehicle. Two-tailed unpaired t-test with Bonferroni's correction after one-way ANOVA (**e**). Two-tailed unpaired t-test with Holm-Šídák's correction (**f–h**). Data are presented as mean values  $\pm$  SEM. *P* values are shown if significant. ns indicates no significant difference. Source data are provided as a Source Data file.

# Supplementary Fig. 3

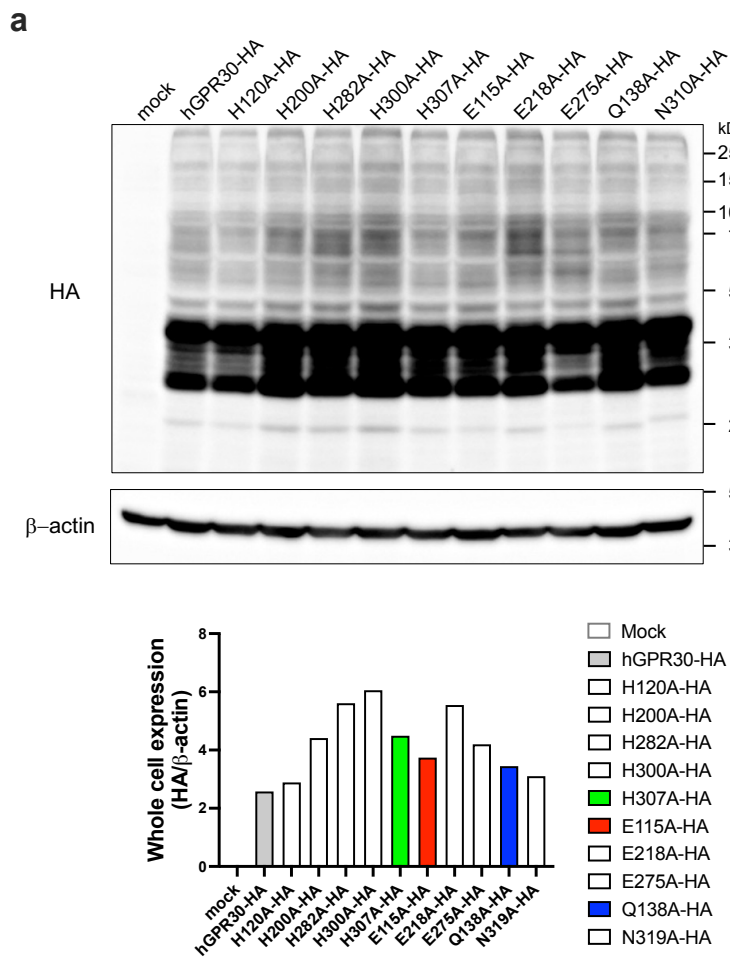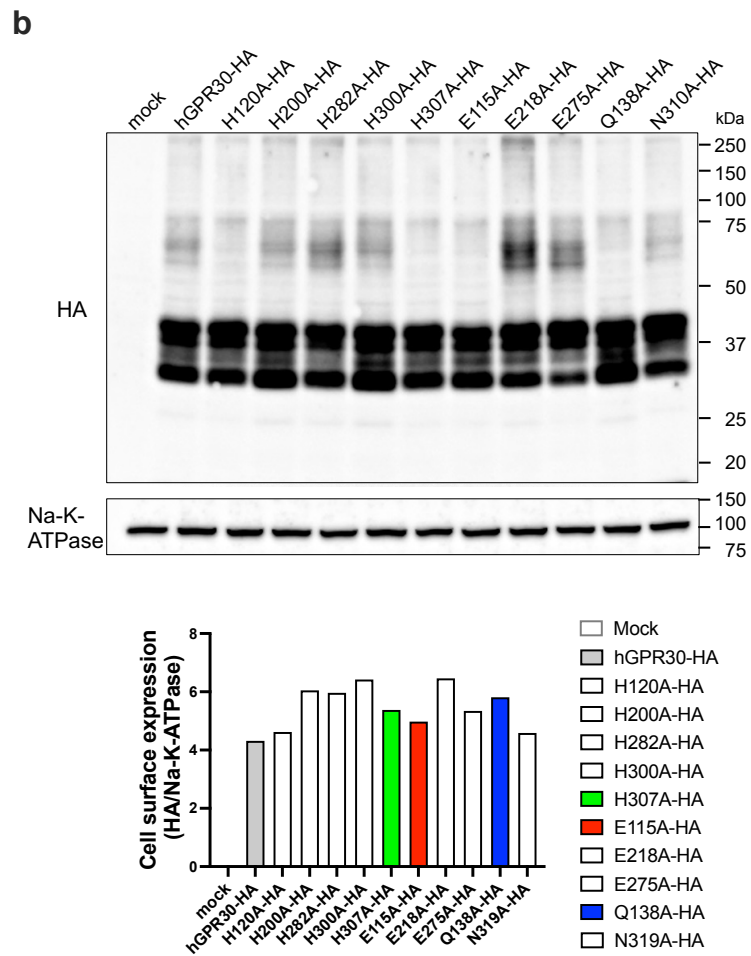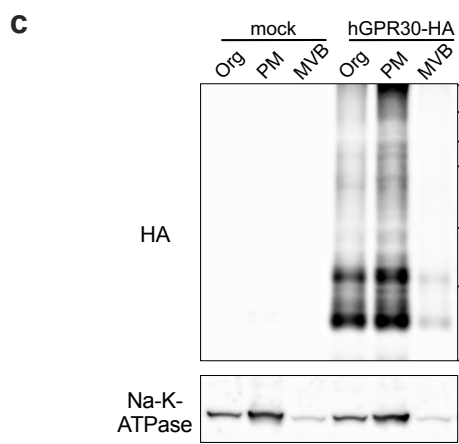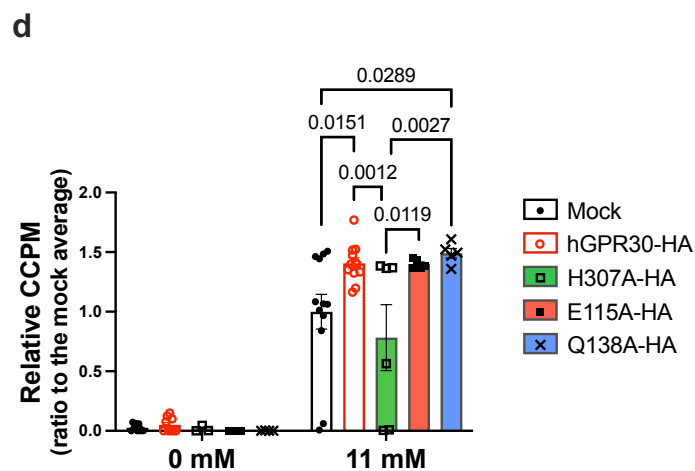

**Supplementary Fig. 3. Cell surface expression and ligand binding of GPR30 mutants.**

**a)** Whole cell expression of HA-tagged mutants analysed using western blotting. **b)** Cell surface expression of HA-tagged mutants, using cell surface biotinylation and avidin immunoprecipitation, analysed using western blotting. **c)** Expression of HA-tagged GPR30 in membrane fractions analysed using western blotting. Org, organellar membrane fraction including endoplasmic reticulum membrane; PM, plasma membrane fraction; MVB, multivesicular body fraction. **d)** Scintillation proximity assay (SPA) using the plasma membrane fraction incubated with sodium bicarbonate- $^{14}\text{C}$  and SPA beads. The plasma membrane fractions of HEK293 cells transiently expressing mock, hGPR30-HA, E115A-HA, Q138A-HA, or H307A-HA were analysed. Statistical analysis: two-tailed unpaired t-test with Tukey's correction after two-way ANOVA (**d**). *P* values are shown if significant. Source data are provided as a Source Data file.

# Supplementary Fig. 4

a

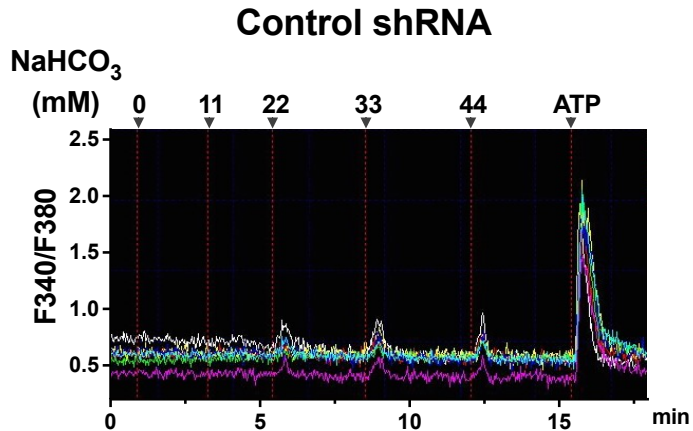

b

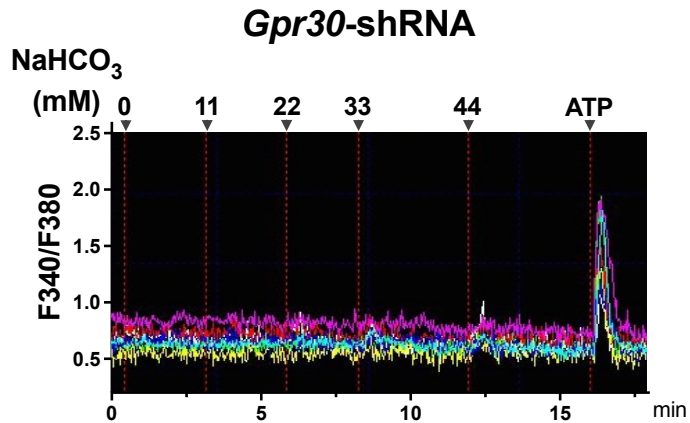



**Supplementary Fig. 4. Endogenous GPR30 is activated by bicarbonate ions *in vitro*.**

Intracellular calcium imaging using Fura-2-loaded mouse myoblast C2C12 cells stably expressing control shRNA (**a**) or *Gpr30*-shRNA (**b**), sequentially treated with indicated concentrations of sodium bicarbonate and ATP.

# Supplementary Fig. 5

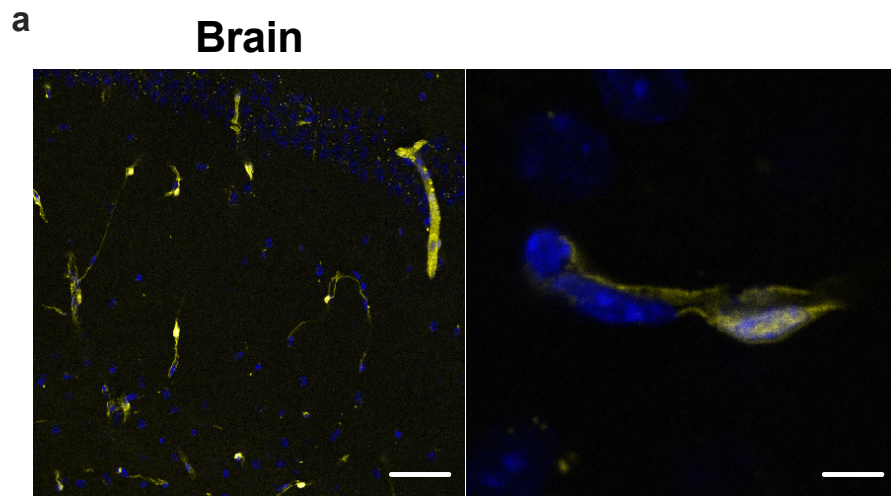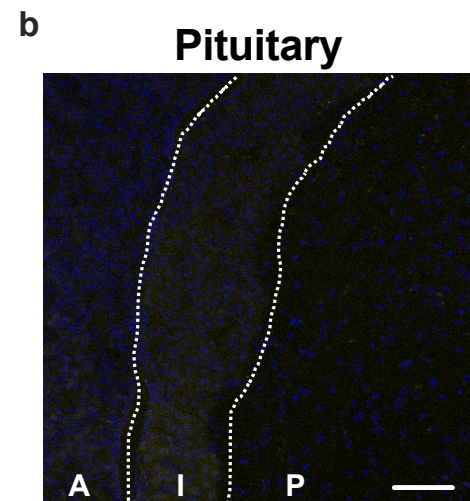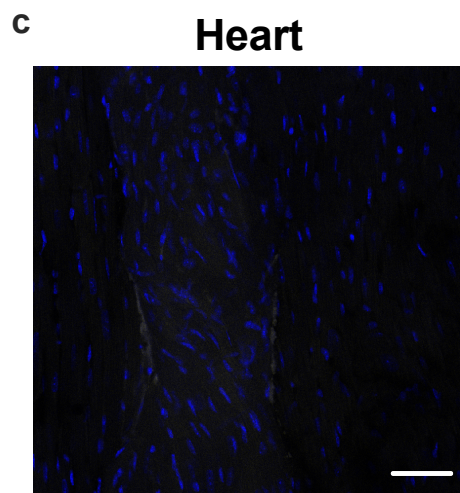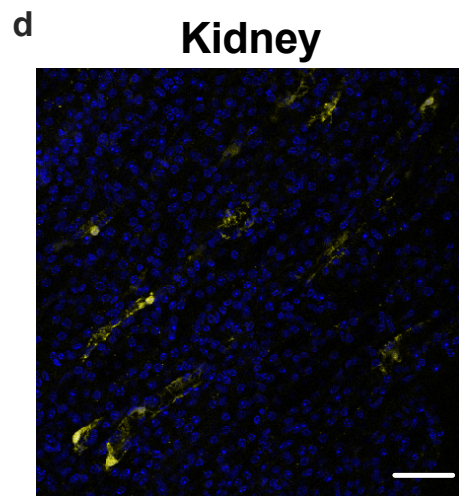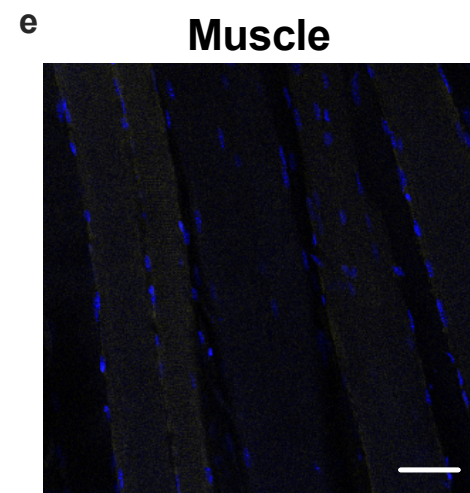

**Supplementary Fig. 5. *Gpr30-Venus-KI* mouse reveals cell type-specific GPR30 expression in the brain and kidneys.**

**(a–e)** Frozen sections of the brain (a), pituitary (b), heart (c), kidney (d), and muscle (e) obtained from heterozygous *Gpr30-Venus-KI* mice were analysed using confocal microscopy. In **(b)**, A, I, and P indicate the anterior, intermediate, and posterior lobes of the pituitary, respectively. The scale bar on the right panel of **(a)**, 5  $\mu\text{m}$ . The other scale bars, 50  $\mu\text{m}$ .

# Supplementary Fig. 6

a

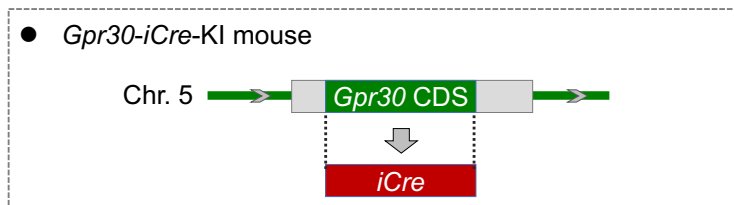

×

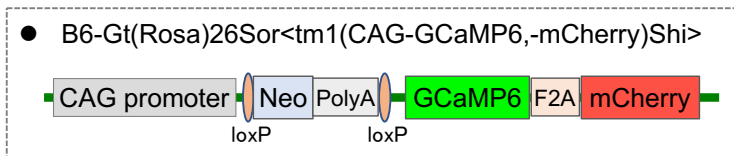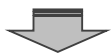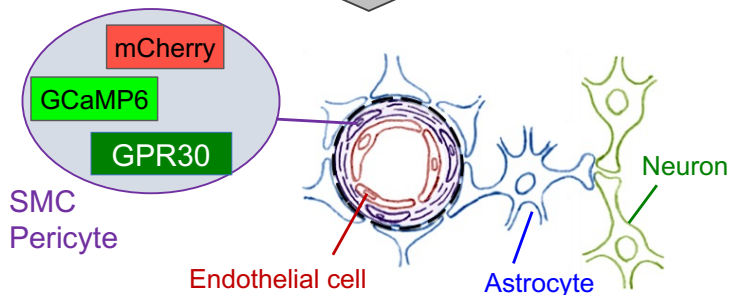

b

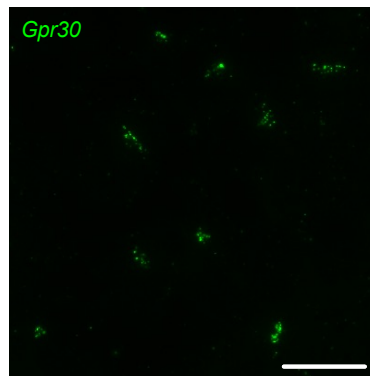

c

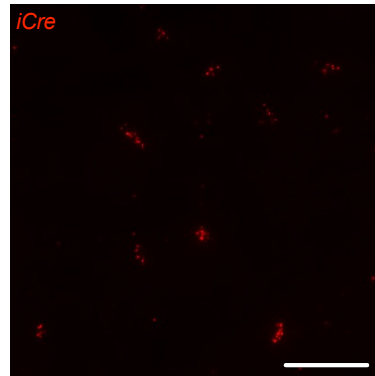

d

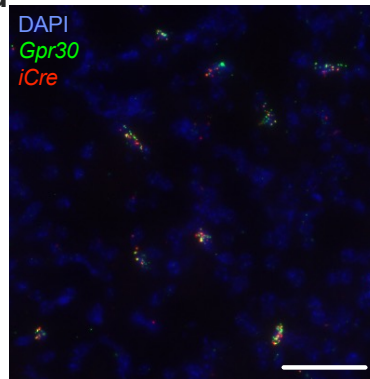

**Supplementary Fig. 6. Generation of *Gpr30-iCre*-KI mouse to specifically analyse intracellular calcium levels in Gpr30-expressing cells.**

**a)** Design of the *Gpr30*- codon-improved Cre recombinase (*iCre*) knock-in (*Gpr30-iCre*-KI) construct. The coding sequence of *Gpr30* was replaced in frame with that of *iCre*. The conditional GCaMP knock-in mice were generated by intercrossing *Gpr30-iCre*-KI mice and B6-Gt(Rosa)26Sor<sup><tm1(CAG-GCaMP6,-mCherry)Shi></sup>. **b–d)** Visualisation of *Gpr30* (**b, d**) and *iCre* (**c, d**) using multiple *in situ* hybridisation analyses of the *Gpr30-iCre*-KI brain cortex. Scale bars, 50  $\mu$ m.

# Supplementary Fig. 7

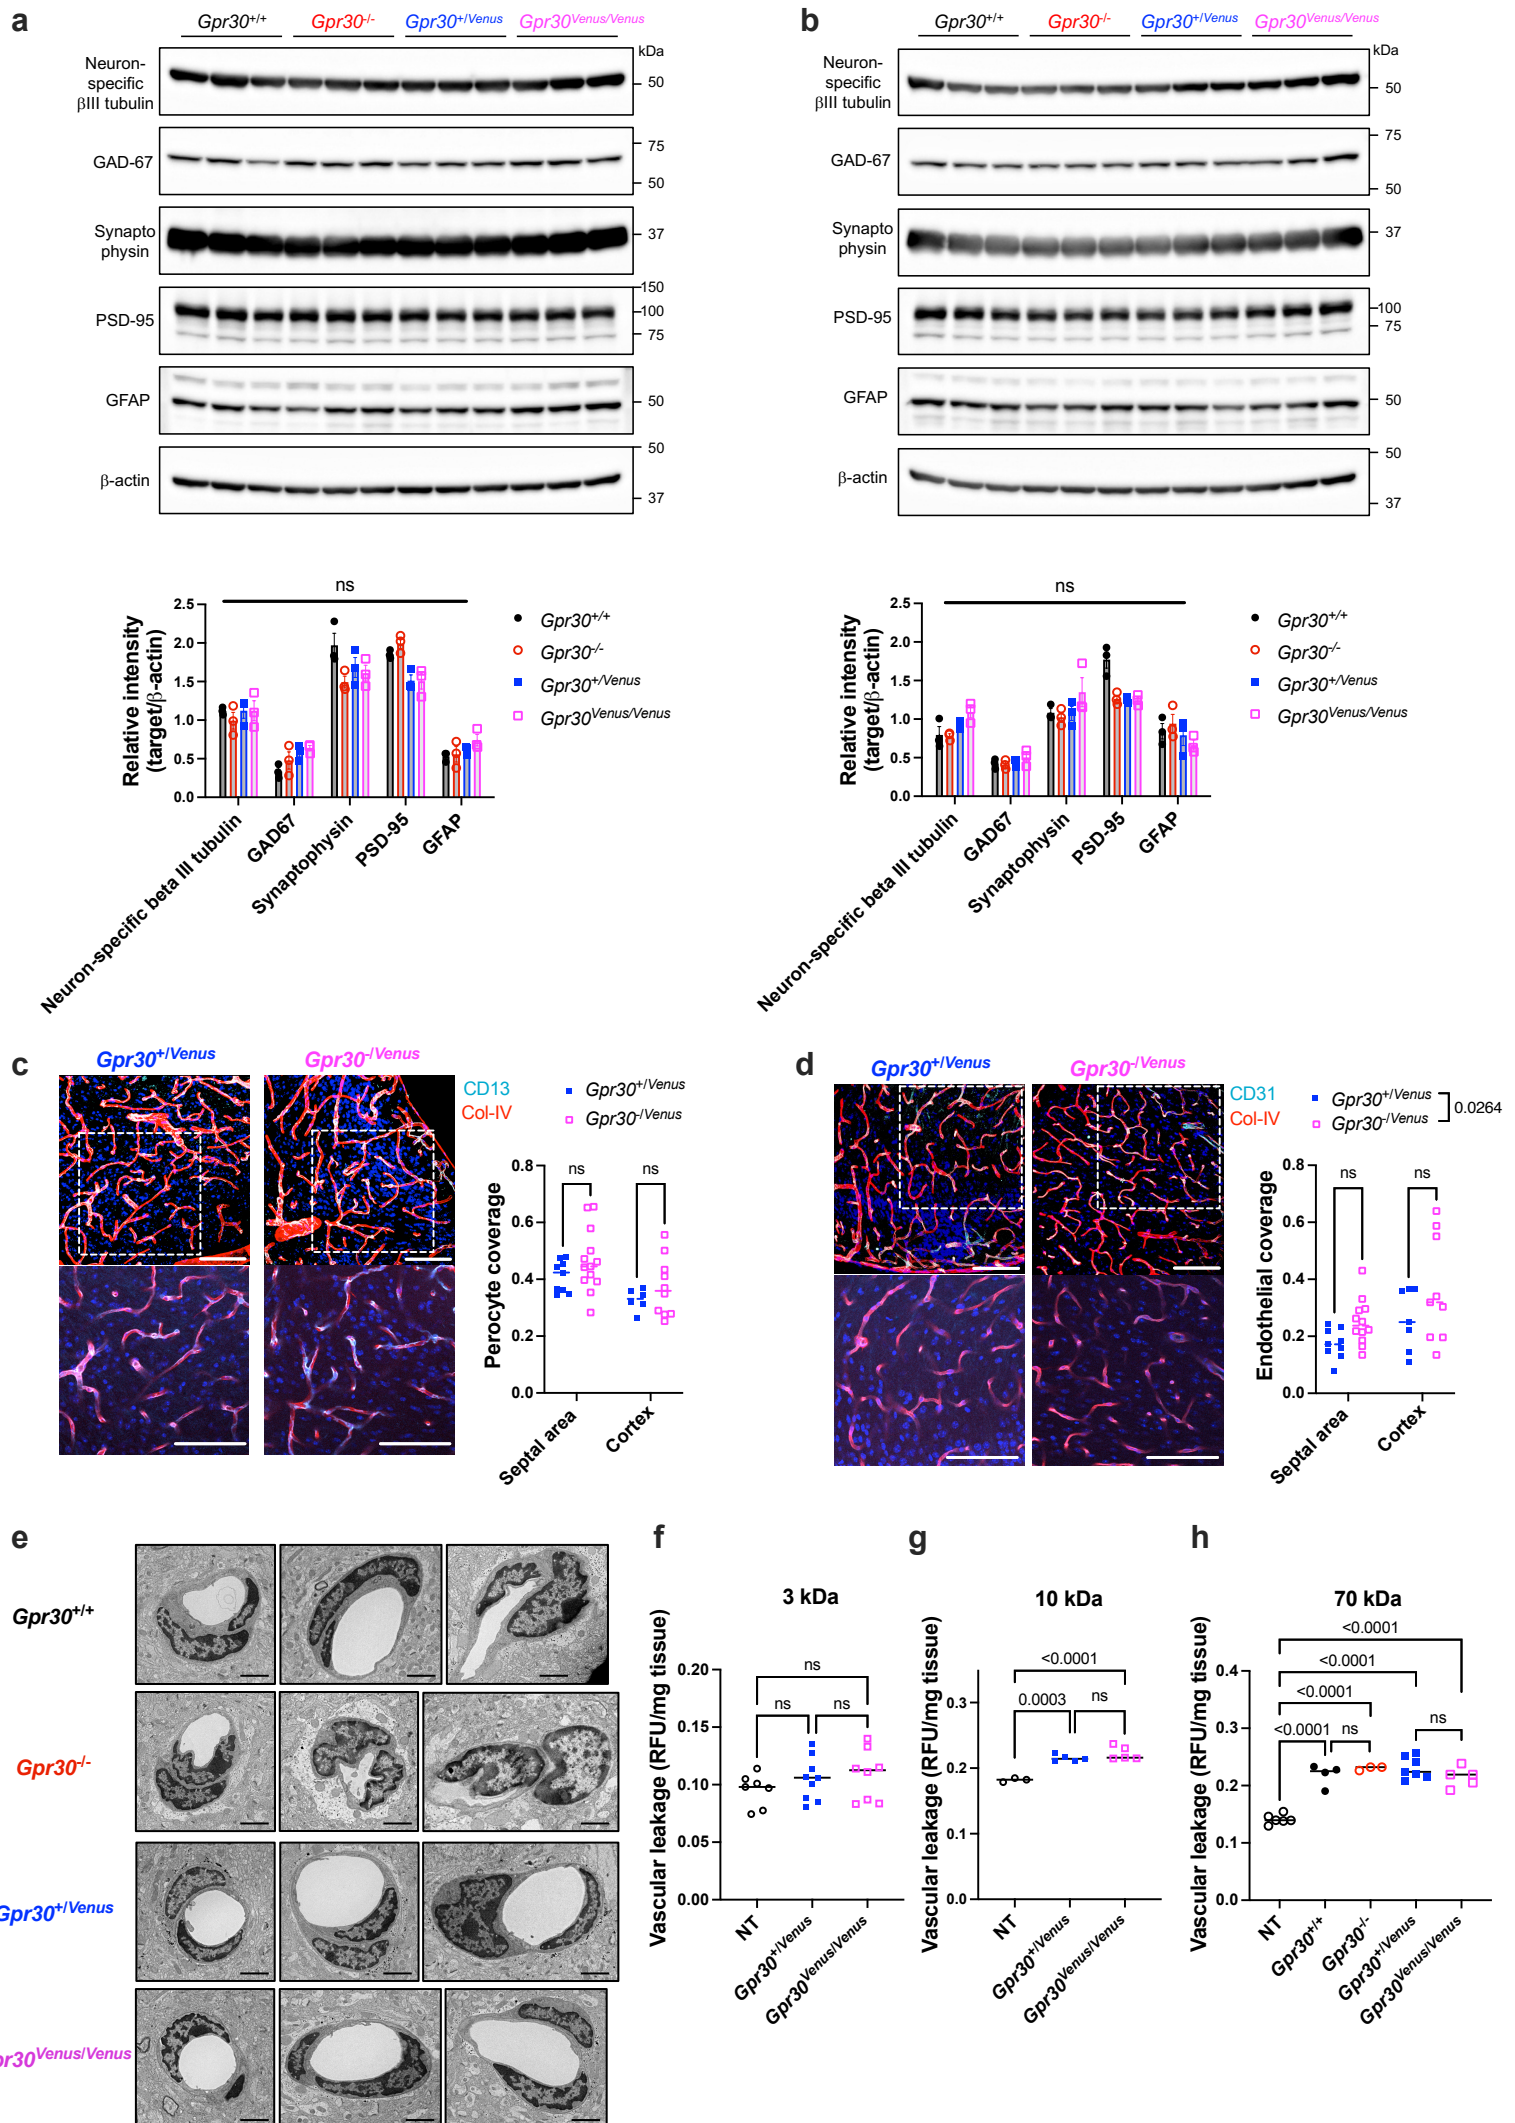



**Supplementary Fig. 7. GPR30 deficiency does not impair the structural or functional integrity of the microvasculature at steady state.**

**a, b)** Western blot analyses of neuronal (neuron-specific  $\beta$ III tubulin, GAD-67), synaptic (synaptophysin and PSD-95), and astrocytic (GFAP) markers in the brain cortex (a) and hippocampus (b). For each target, all the samples were analysed on the same blot and normalized by reprobing the same membrane with anti- $\beta$ -actin antibody. **c)** Quantification of pericyte coverage. **Left**, immunohistochemistry of CD13 (pericytes) and Col-IV (basement membrane) followed by 3D reconstructions of confocal image  $z$ -stacks of  $Gpr30^{+/Venus}$  and  $Gpr30^{-/Venus}$  brain slices. The lower images are the magnification of the white dashed square in the upper image. Scale bars, 100  $\mu$ m. **Right**, pericyte coverage quantified as  $CD13^+Col-IV^+$  volume/ $Col-IV^+$  volume. **d)** Quantification of endothelial cell coverage. **Left**, immunohistochemistry of CD31 (endothelial cell) and Col-IV (basement membrane) followed by 3D reconstructions of confocal image  $z$ -stacks of  $Gpr30^{+/Venus}$  and  $Gpr30^{-/Venus}$  brain slices. The lower images are the magnification of the white dashed square in the upper image. Scale bars, 100  $\mu$ m. **Right**, endothelial coverage quantified as  $CD31^+Col-IV^+$  volume/ $Col-IV^+$  volume. The endothelial coverage of  $Gpr30^{+/Venus}$  and  $Gpr30^{-/Venus}$  mice were significantly different. The difference was no longer significant when analysed in the septal area and cortex subgroups. **e)** Electron microscopy analysis of brain cortices of  $Gpr30^{+/+}$ ,  $Gpr30^{-/-}$ ,  $Gpr30^{+/Venus}$ , and  $Gpr30^{Venus/Venus}$  mice. Scale bars, 2  $\mu$ m. **f–h)** Mice were intravenously injected with 3 (f), 10 (g), or 70 kDa (h) dextran–Tetramethylrhodamine (TMR) and perfused with PBS after 3 h (f), 1 h (g), or 16 h (h). Vascular permeability was evaluated using the relative fluorescence units (RFU) of the leaked TMR per mg of wet tissue weight. NT indicates mice that were

not injected with dextran-TMR. Statistical analysis: two-tailed unpaired t-test with Bonferroni's correction after two-way ANOVA (**a-d**). Two-tailed unpaired t-test with Bonferroni's correction after one-way ANOVA (**f-h**). Data are presented as mean values  $\pm$  SEM. *P* values are shown if significant. ns indicates no significant difference. Source data are provided as a Source Data file.



# Supplementary Fig. 8

**a**

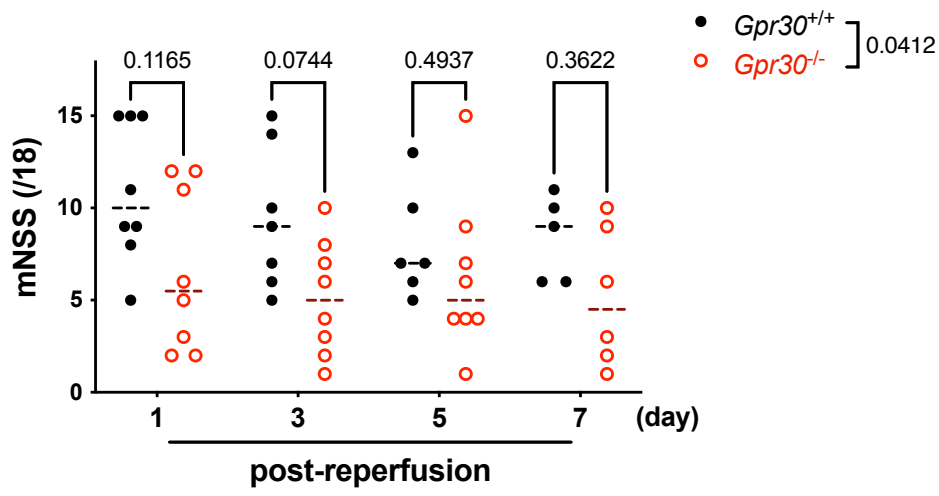

**b**

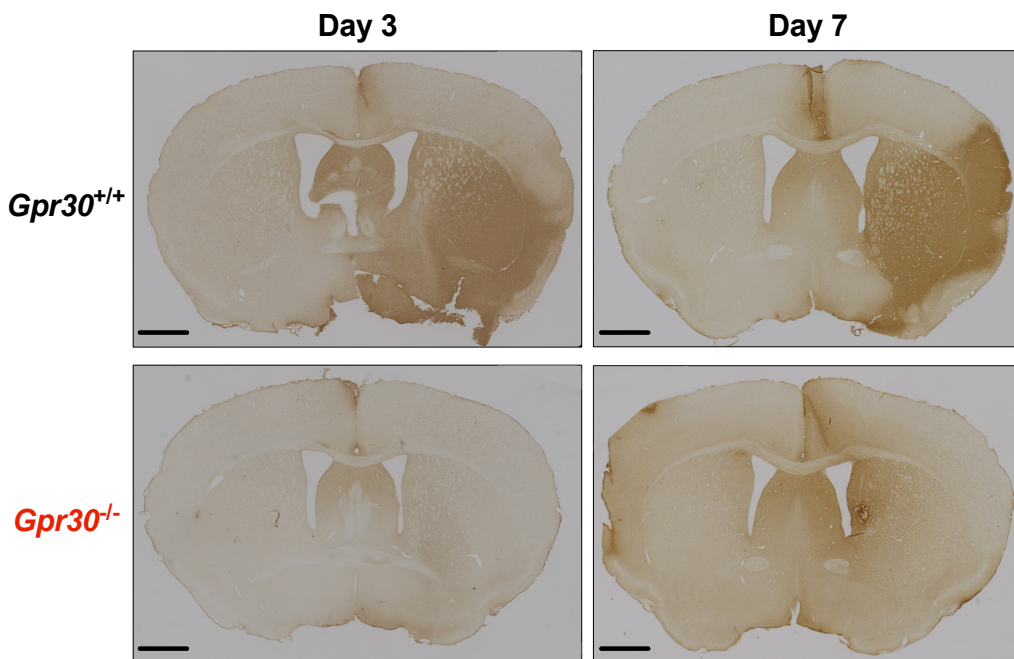

**c**

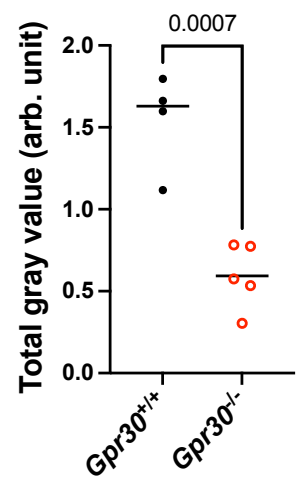

**d**

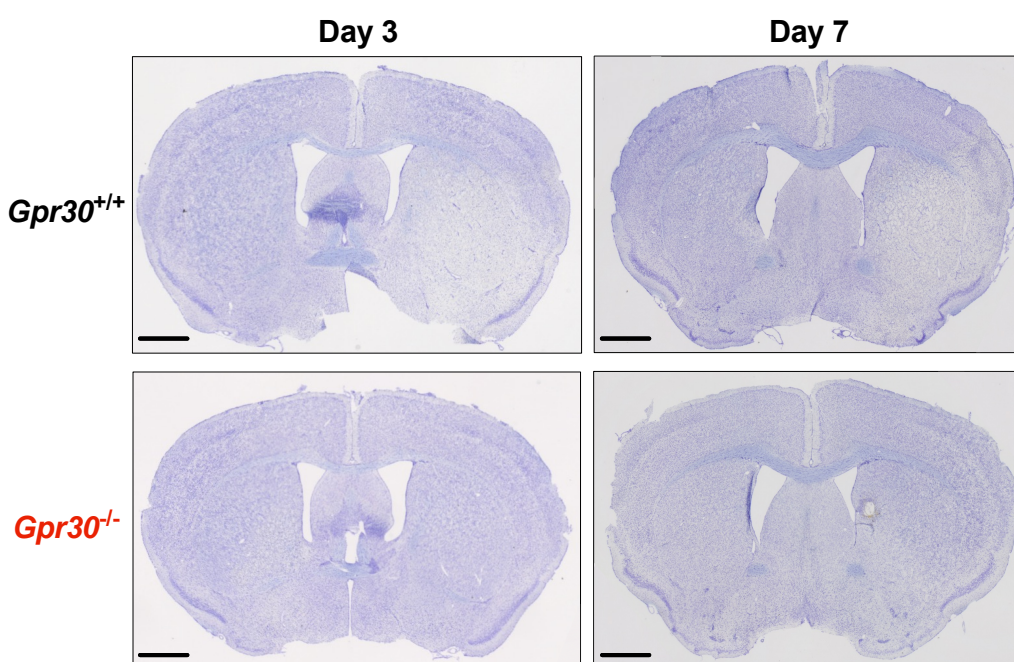

**e**

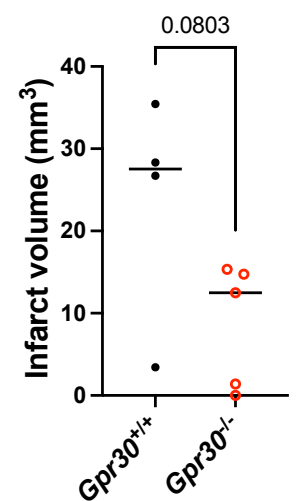

**f**

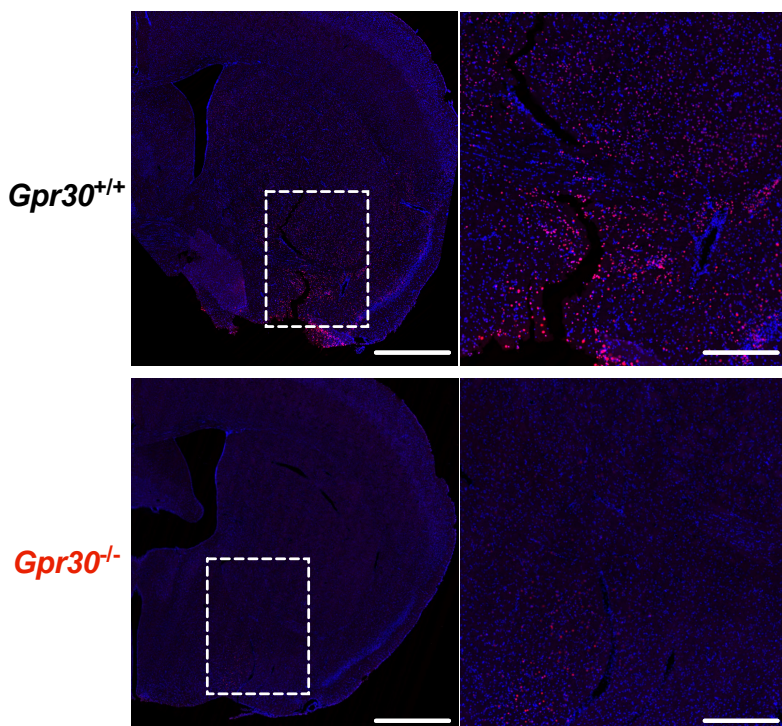

**g**

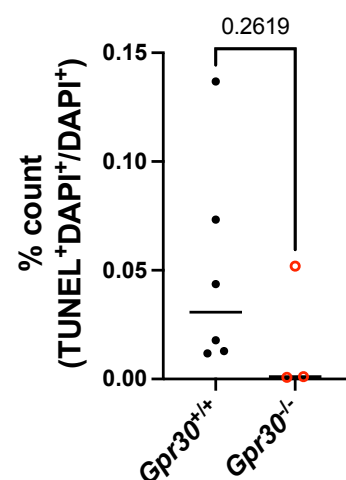

**Supplementary Fig. 8. GPR30-deficient mice are resistant to ischaemia-reperfusion injury at 3 and 7 days after MCAO.**

**a)** Modified Neurological Severity Score (mNSS) of *Gpr30*<sup>+/+</sup> and *Gpr30*<sup>-/-</sup> mice 1 to 7 days after reperfusion. **b, c)** Evaluation of the blood–brain barrier (BBB) impairment. Representative images of IgG immunostaining of *Gpr30*<sup>+/+</sup> and *Gpr30*<sup>-/-</sup> mouse brains at 3 and 7 days after MCAO (b) and quantification of IgG staining of whole brain sections 7 days after MCAO (c). Scale bars, 1 mm. **d, e)** Evaluation of infarct volume. Representative images of cresyl violet staining of *Gpr30*<sup>+/+</sup> and *Gpr30*<sup>-/-</sup> mouse brains 3 and 7 days after MCAO (d) and quantification of cresyl violet staining of whole brain sections 7 days after MCAO (e). Scale bars, 1 mm. **f, g)** Evaluation of apoptosis using TUNEL staining of whole brain sections 3 days after MCAO. Representative images of TUNEL staining (f) show that TUNEL-positive apoptotic cells were hardly detectable in *Gpr30*<sup>-/-</sup> mice. The right images are the magnification of the white dashed square in the left images. Scale bars, 1 mm (the left) and 330  $\mu$ m (the right). Statistical analysis: two-tailed mixed-effects analysis with Bonferroni's correction (**a**). Two-tailed unpaired t-test (**c, e**). Two-tailed Mann–Whitney test (**g**). Data are presented as dot plots with medians. All *p* values are shown. Source data are provided as a Source Data file.

# Supplementary Fig. 9

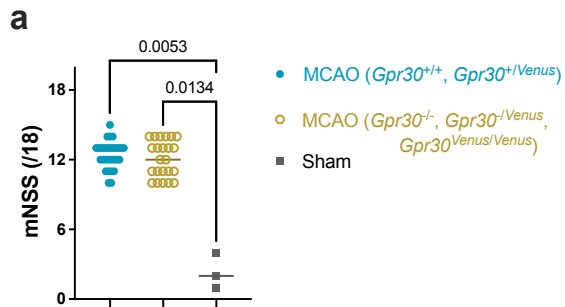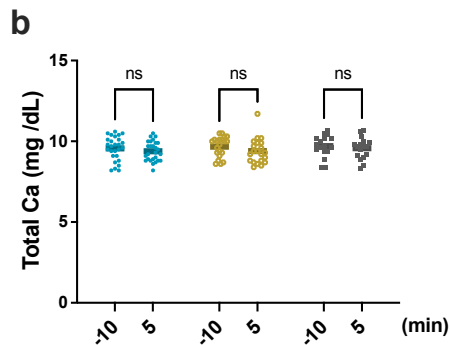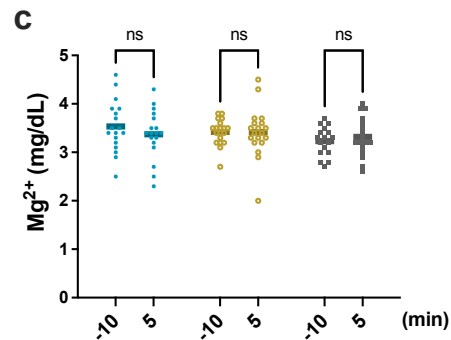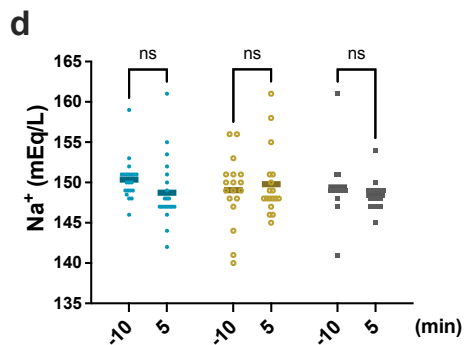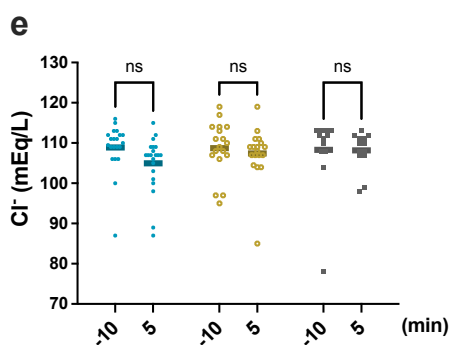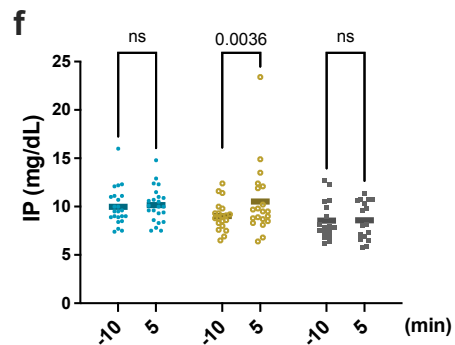

**Supplementary Fig. 9. Serum electrolyte concentrations before and after reperfusion.**

**a)** The modified Neurological Severity Score (mNSS) was analysed 45 min after MCA occlusion. **b–f)** Blood was collected from the facial vein 10 min before and 5 min after reperfusion. Serum concentrations of total Ca (b),  $Mg^{2+}$  (c),  $Na^+$  (d),  $Cl^-$  (e), and inorganic phosphorus (IP, f) were measured. Statistical analysis: **a)** Two-tailed Kruskal–Wallis test with Dunn’s correction. Data are presented as dot plots with medians. **b–f)** Two-tailed unpaired t-test with Bonferroni’s correction after repeated measures two-way ANOVA. Data are presented as dot plots with mean values. *P* values are shown if significant. ns indicates no significant difference. Source data are provided as a Source Data file.

Supplementary Fig. 10

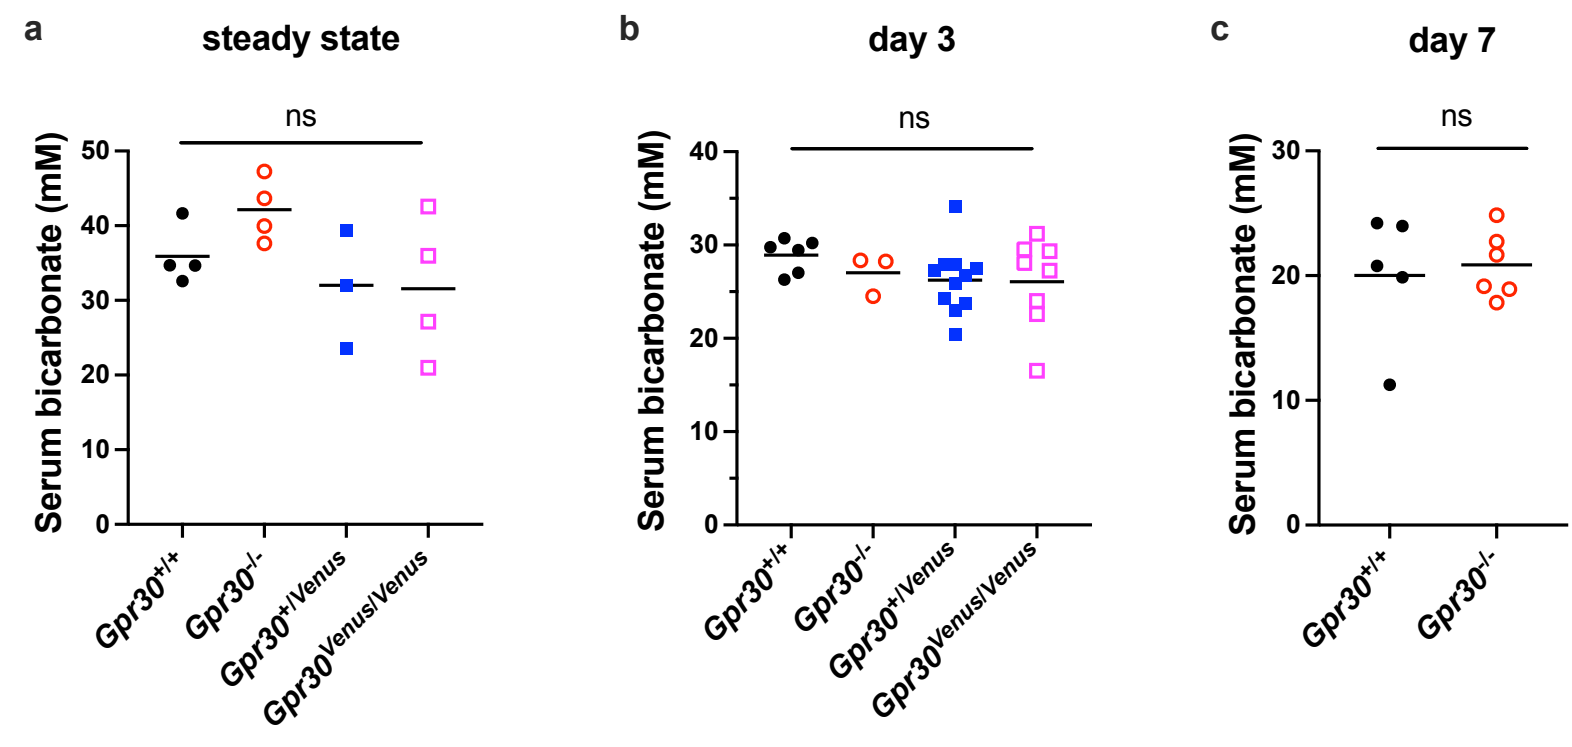

**Supplementary Fig. 10. The serum bicarbonate concentrations at steady state and 3 and 7 days after reperfusion.**

**a–c)** Serum bicarbonate levels were comparable in *Gpr30*<sup>+/+</sup>, *Gpr30*<sup>-/-</sup>, *Gpr30*<sup>+/*Venus*</sup>, and *Gpr30*<sup>*Venus*/*Venus*</sup> mice at steady state (a), 3 (b), and 7 days (c) after MCAO.

Statistical analysis: ns indicates no significant main effect using one-way ANOVA (**a, b**) and two-tailed unpaired t-test (**c**). Data are presented as dot plots with mean values. Source data are provided as a Source Data file.

**Supplementary Table 1. The components and pH of all the buffers used to test functional effects of bicarbonate.**

| The components of Hank's Balanced Salt Solution (HBSS) used in this study          |                                                                                            |
|------------------------------------------------------------------------------------|--------------------------------------------------------------------------------------------|
| components                                                                         | Concentration (mM)                                                                         |
| NaCl                                                                               | 136.99                                                                                     |
| KCl                                                                                | 5.36                                                                                       |
| KH <sub>2</sub> PO <sub>4</sub>                                                    | 0.44                                                                                       |
| Na <sub>2</sub> HPO <sub>4</sub>                                                   | 0.34                                                                                       |
| D-Glucose                                                                          | 5.55                                                                                       |
| CaCl <sub>2</sub>                                                                  | 1.26                                                                                       |
| MgCl <sub>2</sub>                                                                  | 0.49                                                                                       |
| MgSO <sub>4</sub>                                                                  | 0.41                                                                                       |
| HEPES                                                                              | 5.0                                                                                        |
| The pH of the buffers used to test functional effects of bicarbonate in this study |                                                                                            |
| Assay                                                                              | Buffer and pH                                                                              |
| TGF $\alpha$ shedding assay                                                        | HBSS: 7.4<br>alkaline phosphatase (AP) solution: 9.4                                       |
| Calcium assay                                                                      | HBSS: 7.4                                                                                  |
| Cyclic AMP assay                                                                   | HBSS: 7.4                                                                                  |
| Inositol phosphate accumulation assay                                              | HBSS: 7.4                                                                                  |
| SPA                                                                                | 50 mM HEPES, 5 mM MgCl <sub>2</sub> , 1 mM CaCl <sub>2</sub> , 100 mM NaCl, 5% BSA, pH 7.5 |

## Supplementary Table 2. Target position and sequence of shRNA

(Methods: *shRNA* vector and knockdown cell line)

| shRNA | Position<br>NM 029771 | Sequence (5' → 3')                                                                                                                                                                 |
|-------|-----------------------|------------------------------------------------------------------------------------------------------------------------------------------------------------------------------------|
| #1    | 83–102                | sense: GATCCCC-(TCTGGCCCTCAACTTGTCC)-TTCAAGAGA-(GGACAAGTTGAGGGCCAGA)-TTTTTGGAAA<br>antisense: AGCTTTTCCAAAAA-(TCTGGCCCTCAACTTGTCC)-TCTCTTGAA-(GGACAAGTTGAGGGCCAGA)-GGG             |
| #2    | 84–103                | sense: GATCCCC-(CTGGCCCTCAACTTGTCCC)-TTCAAGAGA-(GGGACAAGTTGAGGGCCAG)-TTTTTGGAAA<br>antisense: AGCTTTTCCAAAAA-(CTGGCCCTCAACTTGTCCC)-TCTCTTGAA-(GGGACAAGTTGAGGGCCAG)-GGG             |
| #3    | 163–182               | sense: GATCCCC-(ACGTGATTGCCCTCTTCCT)-TTCAAGAGA-(AGGAAGAGGGCAATCACGT)-TTTTTGGAAA<br>antisense: AGCTTTTCCAAAAA-(ACGTGATTGCCCTCTTCCT)-TCTCTTGAA-(AGGAAGAGGGCAATCACGT)-GGG             |
| #4    | 1523–1543             | sense: GATCCCC-(ACAGGCCACATAGTCAACCTTCTCGAGAA<br>GGTTGACTATGTGGCCTGT)-TTTTTGGAAA<br>antisense: AGCTTTTCCAAAAA-(ACAGGCCACATAGTCAACCTTCTCGAGAAAGTTGACTATGTGGCCTGT)-GGG               |
| #5    | 1670–1690             | sense: GATCCCC-(GCCACGCTCAAGGCCGTCATTCTCGAGAA<br>TGACGGCCTTGAGCGTGGC)-TTTTTGGAAA<br>antisense: AGCTTTTCCAAAAA-(GCCACGCTCAAGGCCGTCATTCTCGAGAAATGACGGCCTTGAGCGTGGC)-GGG              |
| #6    | 761–781               | sense: GATCCCC-(GAGCATCAGCAGTACGTGATTCTCGAGAA<br>TCACGTAAGTCTGATGCTC)-TTTTTGGAAA<br>antisense: AGCTTTTCCAAAAA-(GAGCATCAGCAGTACGTGATTCTCGAGAAATCAGTACTGCTGATGCTC)-GGG               |
| #7    | 1426–1446             | sense: GATCCCC-(GCTGCCGGAGAACGTCTTCATCTCGAGAT<br>GAAGACGTTCTCCGGCAGC)-TTTTTGGAAA<br>antisense: AGCTTTTCCAAAAA-(GCTGCCGGAGAACGTCTTCATCTCGAGATGAAGACGTTCTCCGGCAGC)-GGG               |
| #8    | 807–825               | sense: GATCCCC-(ACCATCTTCCTCTTTCCTATTG)-TTCAAGAGA-(CAATAGGAAAGAGGAAGATGGT)-TTTTTGGAAA<br>antisense: AGCTTTTCCAAAAA-(ACCATCTTCCTCTTTCCTATTG)-TCTCTTGAA-(CAATAGGAAAGAGGAAGATGGT)-GGG |



### Supplementary Table 3. Primer sequence

(Methods: *RNA isolation and quantitative PCR*)

| Gene             | Sequence (5' → 3')                                                 |
|------------------|--------------------------------------------------------------------|
| <i>Tubb3</i>     | Forward: GTCTCTAGCCGCGTGAAGTC<br>Reverse: CATCGCTGATGACCTCCCAG     |
| <i>Gad1</i>      | Forward: CCAGCACGTACTCCTGTGAC<br>Reverse: GGCTACGCCACACCAAGTAT     |
| <i>Gfap</i>      | Forward: TTGCTGGAGGGCGAAGAAAA<br>Reverse: TGGTGAGCCTGTATTGGGAC     |
| <i>Pdgfra</i>    | Forward: CGAAAAATTGTGTCCACCGGG<br>Reverse: CAGCGTGGTGTAGAGGTTGT    |
| <i>Mbp</i>       | Forward: AAAGAAGAGAAGCGTGGGCA<br>Reverse: TGTGCTTGGAGTCTGTCACC     |
| <i>Pdgfrb</i>    | Forward: GTGGAGATTCGCAGGAGGTC<br>Reverse: ATAGCGTGGCTTCTTCTGCC     |
| <i>Cldn5</i>     | Forward: AGTTAAGGCACGGGTAGCAC<br>Reverse: GTA CT TCTGTGACACCGGCA   |
| <i>Abcc9</i>     | Forward: GGAGCTGACAGACACGAACA<br>Reverse: GGTCGGCCAAGTTCCTTACA     |
| <i>Tie2</i>      | Forward: TGTGAAGGTCGAGTTCGAGG<br>Reverse: CTGAGTGGATGAAGGAGCCATT   |
| <i>Gpr30</i> (1) | Forward: AACCTCACTGGGGACCTCTC<br>Reverse: CGGAAGCTGATGTTCCACCAC    |
| <i>Gpr30</i> (2) | Forward: CCATGCACCCACCAAAACAGC<br>Reverse: AGAAAACCAGAAGGGTGGACAG  |
| <i>Actb</i>      | Forward: CATCCGTAAAGACCTCTATGCCAAC<br>Reverse: ATGGAGCCACCGATCCACA |

**Supplementary Table 4. The primary/secondary antibodies used in this study, along the validation statements.**

| Antibody (clone name);<br>supplier name, catalog<br>number            | validation statement                                                                                                                                                                                                                                                                                                                                      |
|-----------------------------------------------------------------------|-----------------------------------------------------------------------------------------------------------------------------------------------------------------------------------------------------------------------------------------------------------------------------------------------------------------------------------------------------------|
| phospho-p44/42 MAPK<br>(Erk1/2); Cell Signaling<br>Technology, #9101  | <a href="https://www.cellsignal.com/products/primary-antibodies/phospho-p44-42-mapk-erk1-2-thr202-tyr204-antibody/9101?country=JP&amp;language=en">https://www.cellsignal.com/products/primary-antibodies/phospho-p44-42-mapk-erk1-2-thr202-tyr204-antibody/9101?country=JP&amp;language=en</a>                                                           |
| ERK2 (C-14); Santa Cruz<br>Biotechnology, sc-154                      | <a href="https://www.scbt.com/p/erk-2-antibody-c-14">https://www.scbt.com/p/erk-2-antibody-c-14</a>                                                                                                                                                                                                                                                       |
| anti-HA High Affinity (3F10);<br>Roche, 11867423001                   | <a href="https://www.sigmaaldrich.com/JP/en/product/roche/roahaha">https://www.sigmaaldrich.com/JP/en/product/roche/roahaha</a>                                                                                                                                                                                                                           |
| Na-K-ATPase; Cell Signaling<br>Technology, #3010                      | <a href="https://www.cellsignal.com/products/primary-antibodies/na-k-atpase-antibody/3010?country=JP&amp;language=en">https://www.cellsignal.com/products/primary-antibodies/na-k-atpase-antibody/3010?country=JP&amp;language=en</a>                                                                                                                     |
| $\beta$ -Actin (AC-15); Santa Cruz<br>Biotechnology, sc-69879         | <a href="https://www.scbt.com/p/beta-actin-antibody-ac-15?requestFrom=search&amp;bvstate=pg:2/ct:r">https://www.scbt.com/p/beta-actin-antibody-ac-15?requestFrom=search&amp;bvstate=pg:2/ct:r</a>                                                                                                                                                         |
| PSD95 (EPR23124-118);<br>Abcam, ab238135                              | <a href="https://www.abcam.com/en-mx/products/primary-antibodies/psd95-antibody-epr23124-118-synaptic-marker-ab238135">https://www.abcam.com/en-mx/products/primary-antibodies/psd95-antibody-epr23124-118-synaptic-marker-ab238135</a>                                                                                                                   |
| Synaptophysin (YE269);<br>Abcam, ab32127                              | <a href="https://www.abcam.com/en-th/products/primary-antibodies/synaptophysin-antibody-ye269-ab32127">https://www.abcam.com/en-th/products/primary-antibodies/synaptophysin-antibody-ye269-ab32127</a>                                                                                                                                                   |
| GAD67 (K-87); Abcam,<br>ab26116                                       | <a href="https://www.abcam.com/en-fi/products/primary-antibodies/gad1-gad67-antibody-k-87-ab26116">https://www.abcam.com/en-fi/products/primary-antibodies/gad1-gad67-antibody-k-87-ab26116</a>                                                                                                                                                           |
| Neuron-specific beta -III<br>Tubulin (TuJ-1); R&D<br>systems, MAB1195 | <a href="https://www.rndsystems.com/products/neuron-specific-beta-iii-tubulin-antibody-tuj-1_mab1195">https://www.rndsystems.com/products/neuron-specific-beta-iii-tubulin-antibody-tuj-1_mab1195</a>                                                                                                                                                     |
| GFAP; Proteintech, 16825-I-<br>AP                                     | <a href="https://www.ptglab.com/products/GFAP-Antibody-16825-1-AP.htm">https://www.ptglab.com/products/GFAP-Antibody-16825-1-AP.htm</a>                                                                                                                                                                                                                   |
| anti-mouse collagen IV; Bio-<br>Rad, #2150-1470                       | <a href="https://www.bio-rad-antibodies.com/polyclonal/mouse-collagen-iv-antibody-2150-1470.html?f=purified">https://www.bio-rad-antibodies.com/polyclonal/mouse-collagen-iv-antibody-2150-1470.html?f=purified</a>                                                                                                                                       |
| anti-CD13-Alexa 647; BD<br>Biosciences, #564352                       | <a href="https://wwwbdbiosciences.com/en-eu/products/reagents/flow-cytometry-reagents/research-reagents/single-color-antibodies-ruo/alexa-fluor-647-rat-anti-mouse-cd13.564352">https://wwwbdbiosciences.com/en-eu/products/reagents/flow-cytometry-reagents/research-reagents/single-color-antibodies-ruo/alexa-fluor-647-rat-anti-mouse-cd13.564352</a> |

anti-CD31-Alexa 647;  
BioLegend, #102515

<https://www.biolegend.com/en-us/products/alex-fluor-647-anti-mouse-cd31-antibody-3094?GroupID=BLG10531>

anti-rabbit IgG, HRP-linked  
Antibody; Cell Signaling  
Technology, #7074

<https://www.cellsignal.com/products/secondary-antibodies/anti-rabbit-igg-hrp-linked-antibody/7074>

anti-mouse IgG, HRP-linked  
Antibody; Cell Signaling  
Technology, #7076

<https://www.cellsignal.com/products/secondary-antibodies/anti-mouse-igg-hrp-linked-antibody/7076>

anti-Rat IgG, HRP-Linked  
Whole Ab Goat; Cytiva,  
NA935

<https://www.citeab.com/antibodies/3288278-na935-amersham-ecl-rat-igg-hrp-linked-whole-antibod>

Alexa 546-labelled donkey  
anti-rabbit IgG; Invitrogen,  
A10040

<https://www.citeab.com/antibodies/2401390-a10040-donkey-anti-rabbit-igg-h-l-highly-cross-ads>

**Supplementary Table 5. Biological and technical replicates in *in vitro* experiments.**

| Figure/Panel | Biological replicates | Technical replicates per experiment | Number of independent experiments | memo                                                                    |
|--------------|-----------------------|-------------------------------------|-----------------------------------|-------------------------------------------------------------------------|
| Fig. 1a      | 2                     | 4                                   | 3                                 |                                                                         |
| Fig. 1b      | 11                    | 4                                   | 6                                 |                                                                         |
| Fig. 1c      | 1                     | 4                                   | 1                                 |                                                                         |
| Fig. 1d      | 1                     | 4                                   | 1                                 |                                                                         |
| Fig. 1e      | 3                     | 4                                   | 9                                 |                                                                         |
| Fig. 1f      | 1                     | 4                                   | 1                                 | TGF $\alpha$ shedding assay with similar results was repeated 10 times. |
| Fig. 2a      | 2                     | 4                                   | 4                                 |                                                                         |
| Fig. 2b      | 1                     | 1                                   | 1                                 |                                                                         |
| Fig. 2c      | 1                     | 3                                   | 3                                 |                                                                         |
| Fig. 2d      | 2                     | 4                                   | 4                                 |                                                                         |
| Fig. 2e      | 7                     | 1                                   | 8                                 |                                                                         |
| Fig. 2f      | 2                     | 1                                   | 2                                 |                                                                         |
| Fig. 2g      | 5                     | 1                                   | 5                                 |                                                                         |
| Fig. 2h      | 1                     | 3                                   | 4                                 |                                                                         |
| Fig. 2i      | 5                     | 3                                   | 5                                 |                                                                         |
| Fig. 3c      | 3                     | 4                                   | 3                                 |                                                                         |
| Fig. 3d      | 4                     | 3                                   | 4                                 |                                                                         |
| Fig. 3g      | 3                     | 1                                   | 3                                 |                                                                         |
| Fig. 3h      | 1                     | 4                                   | 3                                 |                                                                         |

|                       |     |   |                              |                                                                      |
|-----------------------|-----|---|------------------------------|----------------------------------------------------------------------|
| Fig. 4a, b            | 1   | 1 | 6                            | 391 cells examined over 6 experiments.                               |
| Fig. 4c               | 1   | 3 | 3                            |                                                                      |
| Fig. 4d               | 1   | 1 | 11/10<br>(control/shR<br>NA) | 865/784 cells examined over 11/10 experiments.                       |
| Supplementary Fig. 2a | 6   | 3 | 6                            |                                                                      |
| Supplementary Fig. 2b | 2   | 1 | 2                            |                                                                      |
| Supplementary Fig. 2c | 1   | 4 | 1                            |                                                                      |
| Supplementary Fig. 2d | 2   | 5 | 2                            |                                                                      |
| Supplementary Fig. 2e | 2   | 4 | 2                            |                                                                      |
| Supplementary Fig. 2f | 1   | 4 | 1                            |                                                                      |
| Supplementary Fig. 2g | 1   | 4 | 1                            |                                                                      |
| Supplementary Fig. 2h | 1   | 4 | 1                            | The result was confirmed by TGF $\alpha$ shedding assay.             |
| Supplementary Fig. 2i | 1   | 3 | 1                            | TGF $\alpha$ shedding assay with similar results was repeated twice. |
| Supplementary Fig. 2j | 1   | 4 | 1                            |                                                                      |
| Supplementary Fig. 2k | 1   | 3 | 1                            |                                                                      |
| Supplementary Fig. 2l | 1   | 3 | 1                            |                                                                      |
| Supplementary Fig. 3a | 1   | 1 | 2                            |                                                                      |
| Supplementary Fig. 3b | 1   | 1 | 2                            |                                                                      |
| Supplementary Fig. 3c | 4   | 1 | 4                            |                                                                      |
| Supplementary Fig. 3d | 3–8 | 2 | 8                            |                                                                      |
| Supplementary Fig. 4a | 1   | 1 | 11                           | 865 cells examined over 11 experiments.                              |

Supplementary Fig. 4b

1

1

10

784 cells  
examined over 10  
experiments.

**Supplementary Table 6. Species, strain, substrain, sex, age, genotype, and number of animals in *in vivo* experiments.**

Mice were used in all experiments.

| Figure/P<br>anel | strain<br>/substrain                       | sex    | age | genotype                           | numbe<br>r |
|------------------|--------------------------------------------|--------|-----|------------------------------------|------------|
| Fig. 5b          | C57BL/6J<br>(The<br>Jackson<br>Laboratory) | male   | 8   | <i>Gpr30<sup>+/-Venus</sup></i>    | 3          |
|                  |                                            | male   | 8   | <i>Gpr30<sup>-/-Venus</sup></i>    | 3          |
| Fig. 5c–<br>d    | C57BL/6J<br>(The<br>Jackson<br>Laboratory) | male   | 8   | <i>Gpr30<sup>+/-Venus</sup></i>    | 3          |
|                  |                                            | male   | 15  | <i>Gpr30<sup>+/-Venus</sup></i>    | 1          |
| Fig. 5e          | C57BL/6J<br>(The<br>Jackson<br>Laboratory) | female | 6   | <i>Gpr30<sup>+/+</sup></i>         | 2          |
|                  |                                            | female | 8   | <i>Gpr30<sup>+/+</sup></i>         | 2          |
|                  |                                            | male   | 9   | <i>Gpr30<sup>+/+</sup></i>         | 3          |
|                  |                                            | male   | 9   | <i>Gpr30<sup>-/-</sup></i>         | 2          |
|                  |                                            | male   | 10  | <i>Gpr30<sup>+/+</sup></i>         | 3          |
|                  |                                            | male   | 10  | <i>Gpr30<sup>-/-</sup></i>         | 1          |
| Fig. 5f          | C57BL/6J<br>(The<br>Jackson<br>Laboratory) | male   | 2   | <i>Gpr30<sup>+/+</sup></i>         | 1          |
|                  |                                            | male   | 6   | <i>Gpr30<sup>+/+</sup></i>         | 1          |
|                  |                                            | male   | 25  | <i>Gpr30<sup>+/+</sup></i>         | 1          |
| Fig. 5g          | C57BL/6J<br>(The<br>Jackson<br>Laboratory) | male   | 6   | <i>Gpr30<sup>+/+</sup></i>         | 2          |
|                  |                                            | male   | 6   | <i>Gpr30<sup>-/-</sup></i>         | 1          |
| Fig. 5h, i       | C57BL/6J<br>(The<br>Jackson<br>Laboratory) | male   | 3   | <i>Gpr30<sup>+/+</sup></i>         | 2          |
|                  |                                            | female | 4   | <i>Gpr30<sup>+/+</sup></i>         | 2          |
|                  |                                            | male   | 5   | <i>Gpr30<sup>+/+</sup></i>         | 2          |
| Fig. 6a–<br>c    | C57BL/6J<br>(The<br>Jackson<br>Laboratory) | female | 2   | <i>Gpr30<sup>+/-Venus</sup></i>    | 1          |
|                  |                                            | female | 2   | <i>Gpr30<sup>Venus/Venus</sup></i> | 2          |
|                  |                                            | female | 3   | <i>Gpr30<sup>+/-Venus</sup></i>    | 2          |
|                  |                                            | female | 3   | <i>Gpr30<sup>Venus/Venus</sup></i> | 1          |

|               |                                            |        |    |                                                   |   |
|---------------|--------------------------------------------|--------|----|---------------------------------------------------|---|
|               |                                            | female | 4  | <i>Gpr30</i> <sup>+/Venus</sup>                   | 5 |
|               |                                            | male   | 4  | <i>Gpr30</i> <sup>+/Venus</sup>                   | 1 |
|               |                                            | female | 4  | <i>Gpr30</i> <sup>Venus/Venus</sup>               | 5 |
|               |                                            | male   | 5  | <i>Gpr30</i> <sup>+/Venus</sup>                   | 2 |
|               |                                            | female | 5  | <i>Gpr30</i> <sup>Venus/Venus</sup>               | 1 |
|               |                                            | male   | 5  | <i>Gpr30</i> <sup>Venus/Venus</sup>               | 3 |
| Fig. 6d–f     | C57BL/6J<br>(C57BL/6JJ<br>msSlc)           | male   | 9  | <i>Gpr30</i> <sup>+/iCre</sup> ; Rosa26-GCaMP6    | 1 |
|               |                                            | female | 11 | <i>Gpr30</i> <sup>+/iCre</sup> ; Rosa26-GCaMP6    | 2 |
|               |                                            | female | 12 | <i>Gpr30</i> <sup>iCre/iCre</sup> ; Rosa26-GCaMP6 | 1 |
|               |                                            | male   | 20 | <i>Gpr30</i> <sup>+/iCre</sup> ; Rosa26-GCaMP6    | 1 |
|               |                                            | male   | 21 | <i>Gpr30</i> <sup>iCre/iCre</sup> ; Rosa26-GCaMP6 | 1 |
|               |                                            | male   | 25 | <i>Gpr30</i> <sup>+/iCre</sup> ; Rosa26-GCaMP6    | 1 |
|               |                                            | male   | 30 | <i>Gpr30</i> <sup>+/iCre</sup> ; Rosa26-GCaMP6    | 1 |
|               |                                            | male   | 30 | <i>Gpr30</i> <sup>iCre/iCre</sup> ; Rosa26-GCaMP6 | 2 |
| Fig. 6g–i     | C57BL/6J<br>(C57BL/6JJ<br>msSlc)           | male   | 9  | <i>Gpr30</i> <sup>+/iCre</sup> ; Rosa26-GCaMP6    | 1 |
|               |                                            | female | 11 | <i>Gpr30</i> <sup>+/iCre</sup> ; Rosa26-GCaMP6    | 2 |
|               |                                            | female | 12 | <i>Gpr30</i> <sup>iCre/iCre</sup> ; Rosa26-GCaMP6 | 1 |
|               |                                            | male   | 20 | <i>Gpr30</i> <sup>+/iCre</sup> ; Rosa26-GCaMP6    | 1 |
|               |                                            | male   | 21 | <i>Gpr30</i> <sup>iCre/iCre</sup> ; Rosa26-GCaMP6 | 1 |
| Fig. 7b       | C57BL/6J<br>(The<br>Jackson<br>Laboratory) | male   | 14 | <i>Gpr30</i> <sup>+/Venus</sup>                   | 5 |
|               |                                            | male   | 14 | <i>Gpr30</i> <sup>Venus/Venus</sup>               | 4 |
|               |                                            | male   | 15 | <i>Gpr30</i> <sup>+/Venus</sup>                   | 3 |
|               |                                            | male   | 15 | <i>Gpr30</i> <sup>Venus/Venus</sup>               | 2 |
|               |                                            | male   | 16 | <i>Gpr30</i> <sup>+/Venus</sup>                   | 3 |
|               |                                            | male   | 16 | <i>Gpr30</i> <sup>Venus/Venus</sup>               | 2 |
| Fig. 7c–<br>d | C57BL/6J<br>(The<br>Jackson<br>Laboratory) | male   | 14 | <i>Gpr30</i> <sup>+/Venus</sup>                   | 4 |
|               |                                            | male   | 14 | <i>Gpr30</i> <sup>Venus/Venus</sup>               | 3 |
|               |                                            | male   | 15 | <i>Gpr30</i> <sup>+/Venus</sup>                   | 3 |
|               |                                            | male   | 15 | <i>Gpr30</i> <sup>Venus/Venus</sup>               | 2 |
|               |                                            | male   | 16 | <i>Gpr30</i> <sup>+/Venus</sup>                   | 3 |
|               |                                            | male   | 16 | <i>Gpr30</i> <sup>Venus/Venus</sup>               | 2 |
| Fig. 7e–f     | C57BL/6J<br>(The                           | male   | 14 | <i>Gpr30</i> <sup>+/Venus</sup>                   | 5 |
|               |                                            | male   | 14 | <i>Gpr30</i> <sup>Venus/Venus</sup>               | 4 |
|               |                                            | male   | 15 | <i>Gpr30</i> <sup>+/Venus</sup>                   | 3 |



|           |                                   |      |       |                                                                                                      |    |
|-----------|-----------------------------------|------|-------|------------------------------------------------------------------------------------------------------|----|
|           | Jackson Laboratory)               | male | 15    | <i>Gpr30</i> <sup>Venus/Venus</sup>                                                                  | 2  |
|           |                                   | male | 16    | <i>Gpr30</i> <sup>+ /Venus</sup>                                                                     | 3  |
|           |                                   | male | 16    | <i>Gpr30</i> <sup>Venus/Venus</sup>                                                                  | 2  |
| Fig. 7g–h | C57BL/6J (The Jackson Laboratory) | male | 14    | <i>Gpr30</i> <sup>+ /Venus</sup>                                                                     | 4  |
|           |                                   | male | 14    | <i>Gpr30</i> <sup>Venus/Venus</sup>                                                                  | 3  |
|           |                                   | male | 15    | <i>Gpr30</i> <sup>+ /Venus</sup>                                                                     | 3  |
|           |                                   | male | 15    | <i>Gpr30</i> <sup>Venus/Venus</sup>                                                                  | 2  |
|           |                                   | male | 16    | <i>Gpr30</i> <sup>+ /Venus</sup>                                                                     | 3  |
|           |                                   | male | 16    | <i>Gpr30</i> <sup>Venus/Venus</sup>                                                                  | 2  |
| Fig. 8b   | C57BL/6J (The Jackson Laboratory) | male | 10–20 | <i>Gpr30</i> <sup>+/+</sup> , <i>Gpr30</i> <sup>+ /Venus</sup>                                       | 27 |
|           |                                   | male | 10–20 | <i>Gpr30</i> <sup>-/-</sup> , <i>Gpr30</i> <sup>- /Venus</sup> , <i>Gpr30</i> <sup>Venus/Venus</sup> | 21 |
|           |                                   | male | 10–18 | sham                                                                                                 | 23 |
| Fig. 8d–e | C57BL/6J (The Jackson Laboratory) | male | 9     | <i>Gpr30</i> <sup>+/+</sup>                                                                          | 1  |
|           |                                   | male | 9     | <i>Gpr30</i> <sup>-/-</sup>                                                                          | 1  |
|           |                                   | male | 10    | <i>Gpr30</i> <sup>+/+</sup>                                                                          | 4  |
|           |                                   | male | 10    | <i>Gpr30</i> <sup>-/-</sup>                                                                          | 3  |
|           |                                   | male | 10    | <i>Gpr30</i> <sup>+ /Venus</sup>                                                                     | 1  |
|           |                                   | male | 11    | <i>Gpr30</i> <sup>Venus/Venus</sup>                                                                  | 1  |
|           |                                   | male | 12    | <i>Gpr30</i> <sup>+ /Venus</sup>                                                                     | 3  |
|           |                                   | male | 12    | <i>Gpr30</i> <sup>Venus/Venus</sup>                                                                  | 2  |
|           |                                   | male | 13    | <i>Gpr30</i> <sup>+ /Venus</sup>                                                                     | 1  |
|           |                                   | male | 13    | <i>Gpr30</i> <sup>Venus/Venus</sup>                                                                  | 2  |
|           |                                   | male | 14    | <i>Gpr30</i> <sup>-/-</sup>                                                                          | 2  |
|           |                                   | male | 15    | <i>Gpr30</i> <sup>Venus/Venus</sup>                                                                  | 1  |
| Fig. 8g–h | C57BL/6J (The Jackson Laboratory) | male | 11    | <i>Gpr30</i> <sup>+/+</sup>                                                                          | 1  |
|           |                                   | male | 11    | <i>Gpr30</i> <sup>-/-</sup>                                                                          | 2  |
|           |                                   | male | 12    | <i>Gpr30</i> <sup>+/+</sup>                                                                          | 1  |
|           |                                   | male | 13    | <i>Gpr30</i> <sup>+/+</sup>                                                                          | 2  |
|           |                                   | male | 14    | <i>Gpr30</i> <sup>Venus/Venus</sup>                                                                  | 1  |
|           |                                   | male | 17    | <i>Gpr30</i> <sup>Venus/Venus</sup>                                                                  | 1  |
|           |                                   | male | 20    | <i>Gpr30</i> <sup>+ /Venus</sup>                                                                     | 2  |
|           |                                   | male | 20    | <i>Gpr30</i> <sup>Venus/Venus</sup>                                                                  | 1  |
|           |                                   | male | 21    | <i>Gpr30</i> <sup>+ /Venus</sup>                                                                     | 1  |

|                                    |                                            |        |       |                                    |   |
|------------------------------------|--------------------------------------------|--------|-------|------------------------------------|---|
|                                    |                                            | male   | 21    | <i>Gpr30<sup>Venus/Venus</sup></i> | 1 |
|                                    |                                            | male   | 23    | <i>Gpr30<sup>+/+</sup></i>         | 1 |
|                                    |                                            | male   | 23    | <i>Gpr30<sup>-/-</sup></i>         | 1 |
| Supplem<br>entary<br>Fig. 5        | C57BL/6J<br>(The<br>Jackson<br>Laboratory) | male   | 25    | <i>Gpr30<sup>+Venus</sup></i>      | 1 |
| Supplem<br>entary<br>Fig. 6b–<br>d | C57BL/6J<br>(C57BL/6J<br>msSlc)            | female | 3     | <i>Gpr30<sup>+iCre</sup></i>       | 4 |
|                                    |                                            | male   | 3     | <i>Gpr30<sup>+iCre</sup></i>       | 2 |
|                                    |                                            | female | 19    | <i>Gpr30<sup>+iCre</sup></i>       | 2 |
|                                    |                                            | female | 19    | <i>Gpr30<sup>iCre/iCre</sup></i>   | 2 |
| Supplem<br>entary<br>Fig. 7a–<br>b | C57BL/6J<br>(The<br>Jackson<br>Laboratory) | male   | 15–17 | <i>Gpr30<sup>+/+</sup></i>         | 3 |
|                                    |                                            | male   | 15–17 | <i>Gpr30<sup>-/-</sup></i>         | 3 |
|                                    |                                            | male   | 15–17 | <i>Gpr30<sup>+Venus</sup></i>      | 3 |
|                                    |                                            | male   | 15–17 | <i>Gpr30<sup>Venus/Venus</sup></i> | 3 |
| Supplem<br>entary<br>Fig. 7c       | C57BL/6J<br>(The<br>Jackson<br>Laboratory) | male   | 8     | <i>Gpr30<sup>+Venus</sup></i>      | 3 |
|                                    |                                            | male   | 8     | <i>Gpr30<sup>-Venus</sup></i>      | 4 |
| Supplem<br>entary<br>Fig. 7d       | C57BL/6J<br>(The<br>Jackson<br>Laboratory) | male   | 8     | <i>Gpr30<sup>+Venus</sup></i>      | 3 |
|                                    |                                            | male   | 8     | <i>Gpr30<sup>-Venus</sup></i>      | 4 |
| Supplem<br>entary<br>Fig. 7e       | C57BL/6J<br>(The<br>Jackson<br>Laboratory) | male   | 9     | <i>Gpr30<sup>+Venus</sup></i>      | 3 |
|                                    |                                            | male   | 9     | <i>Gpr30<sup>Venus/Venus</sup></i> | 3 |
|                                    |                                            | male   | 11    | <i>Gpr30<sup>+/+</sup></i>         | 1 |
|                                    |                                            | male   | 11    | <i>Gpr30<sup>-/-</sup></i>         | 1 |
|                                    |                                            | male   | 15    | <i>Gpr30<sup>+/+</sup></i>         | 1 |
|                                    |                                            | male   | 15    | <i>Gpr30<sup>-/-</sup></i>         | 1 |
|                                    |                                            | male   | 18    | <i>Gpr30<sup>+/+</sup></i>         | 1 |
|                                    |                                            | male   | 18    | <i>Gpr30<sup>-/-</sup></i>         | 1 |
| Supplem<br>entary<br>Fig. 7f       | C57BL/6J<br>(The<br>Jackson<br>Laboratory) | male   | 11    | <i>Gpr30<sup>+/+</sup></i>         | 3 |
|                                    |                                            | male   | 11    | <i>Gpr30<sup>+Venus</sup></i>      | 3 |
|                                    |                                            | male   | 11    | <i>Gpr30<sup>Venus/Venus</sup></i> | 3 |
|                                    |                                            | male   | 14    | <i>Gpr30<sup>+/+</sup></i>         | 1 |

|                              |                                            |      |    |                                      |   |
|------------------------------|--------------------------------------------|------|----|--------------------------------------|---|
|                              |                                            | male | 14 | <i>Gpr30<sup>+ / Venus</sup></i>     | 2 |
|                              |                                            | male | 14 | <i>Gpr30<sup>Venus / Venus</sup></i> | 2 |
|                              |                                            | male | 16 | <i>Gpr30<sup>+ / Venus</sup></i>     | 1 |
|                              |                                            | male | 16 | <i>Gpr30<sup>Venus / Venus</sup></i> | 1 |
|                              |                                            | male | 18 | <i>Gpr30<sup>+ / Venus</sup></i>     | 2 |
|                              |                                            | male | 18 | <i>Gpr30<sup>Venus / Venus</sup></i> | 1 |
|                              |                                            | male | 20 | <i>Gpr30<sup>+ / Venus</sup></i>     | 3 |
|                              |                                            | male | 20 | <i>Gpr30<sup>Venus / Venus</sup></i> | 2 |
| Supplem<br>entary<br>Fig. 7g | C57BL/6J<br>(The<br>Jackson<br>Laboratory) | male | 7  | <i>Gpr30<sup>+ / +</sup></i>         | 2 |
|                              |                                            | male | 7  | <i>Gpr30<sup>+ / Venus</sup></i>     | 6 |
|                              |                                            | male | 7  | <i>Gpr30<sup>Venus / Venus</sup></i> | 5 |
| Supplem<br>entary<br>Fig. 7h | C57BL/6J<br>(The<br>Jackson<br>Laboratory) | male | 5  | <i>Gpr30<sup>+ / -</sup></i>         | 1 |
|                              |                                            | male | 7  | <i>Gpr30<sup>+ / Venus</sup></i>     | 2 |
|                              |                                            | male | 7  | <i>Gpr30<sup>Venus / Venus</sup></i> | 1 |
|                              |                                            | male | 8  | <i>Gpr30<sup>+ / +</sup></i>         | 1 |
|                              |                                            | male | 8  | <i>Gpr30<sup>- / -</sup></i>         | 1 |
|                              |                                            | male | 8  | <i>Gpr30<sup>+ / Venus</sup></i>     | 3 |
|                              |                                            | male | 8  | <i>Gpr30<sup>Venus / Venus</sup></i> | 3 |
|                              |                                            | male | 9  | <i>Gpr30<sup>+ / +</sup></i>         | 2 |
|                              |                                            | male | 9  | <i>Gpr30<sup>- / -</sup></i>         | 1 |
|                              |                                            | male | 9  | <i>Gpr30<sup>+ / Venus</sup></i>     | 4 |
|                              |                                            | male | 9  | <i>Gpr30<sup>Venus / Venus</sup></i> | 2 |
|                              |                                            | male | 10 | <i>Gpr30<sup>+ / +</sup></i>         | 2 |
|                              |                                            | male | 12 | <i>Gpr30<sup>+ / +</sup></i>         | 1 |
|                              |                                            | male | 12 | <i>Gpr30<sup>- / -</sup></i>         | 1 |
| Supplem<br>entary<br>Fig. 8a | C57BL/6J<br>(The<br>Jackson<br>Laboratory) | male | 14 | <i>Gpr30<sup>+ / +</sup></i>         | 3 |
|                              |                                            | male | 14 | <i>Gpr30<sup>- / -</sup></i>         | 2 |
|                              |                                            | male | 15 | <i>Gpr30<sup>+ / +</sup></i>         | 1 |
|                              |                                            | male | 15 | <i>Gpr30<sup>- / -</sup></i>         | 1 |
|                              |                                            | male | 18 | <i>Gpr30<sup>+ / +</sup></i>         | 3 |
|                              |                                            | male | 18 | <i>Gpr30<sup>- / -</sup></i>         | 4 |
|                              |                                            | male | 20 | <i>Gpr30<sup>+ / +</sup></i>         | 1 |
|                              |                                            | male | 20 | <i>Gpr30<sup>- / -</sup></i>         | 1 |

|                         |                                   |                       |                                   |                                                                                                                   |       |
|-------------------------|-----------------------------------|-----------------------|-----------------------------------|-------------------------------------------------------------------------------------------------------------------|-------|
| Supplementary Fig. 8b–g | C57BL/6J (The Jackson Laboratory) | male                  | 14                                | <i>Gpr30</i> <sup>+/+</sup> (3-day model)                                                                         | 6     |
|                         |                                   | male                  | 14                                | <i>Gpr30</i> <sup>-/-</sup> (3-day model)                                                                         | 3     |
|                         |                                   | male                  | 15                                | <i>Gpr30</i> <sup>+/+</sup> (7-day model)                                                                         | 1     |
|                         |                                   | male                  | 15                                | <i>Gpr30</i> <sup>-/-</sup> (7-day model)                                                                         | 1     |
|                         |                                   | male                  | 18                                | <i>Gpr30</i> <sup>+/+</sup> (7-day model)                                                                         | 2     |
|                         |                                   | male                  | 18                                | <i>Gpr30</i> <sup>-/-</sup> (7-day model)                                                                         | 3     |
|                         |                                   | male                  | 20                                | <i>Gpr30</i> <sup>+/+</sup> (7-day model)                                                                         | 1     |
|                         |                                   | male                  | 20                                | <i>Gpr30</i> <sup>-/-</sup> (7-day model)                                                                         | 1     |
|                         |                                   | Supplementary Fig. 9a | C57BL/6J (The Jackson Laboratory) | male                                                                                                              | 10–20 |
| male                    | 10–20                             |                       |                                   | <i>Gpr30</i> <sup>-/-</sup> , <i>Gpr30</i> <sup>-/<i>Venus</i></sup> , <i>Gpr30</i> <sup><i>Venus/Venus</i></sup> | 23    |
| male                    | 10–18                             |                       |                                   | sham                                                                                                              | 3     |
| Supplementary Fig. 9b   | C57BL/6J (The Jackson Laboratory) | male                  | 10–20                             | <i>Gpr30</i> <sup>+/+</sup> , <i>Gpr30</i> <sup>+/<i>Venus</i></sup>                                              | 27    |
|                         |                                   | male                  | 10–20                             | <i>Gpr30</i> <sup>-/-</sup> , <i>Gpr30</i> <sup>-/<i>Venus</i></sup> , <i>Gpr30</i> <sup><i>Venus/Venus</i></sup> | 21    |
|                         |                                   | male                  | 10–18                             | sham                                                                                                              | 17    |
| Supplementary Fig. 9c   | C57BL/6J (The Jackson Laboratory) | male                  | 10–20                             | <i>Gpr30</i> <sup>+/+</sup> , <i>Gpr30</i> <sup>+/<i>Venus</i></sup>                                              | 18    |
|                         |                                   | male                  | 10–20                             | <i>Gpr30</i> <sup>-/-</sup> , <i>Gpr30</i> <sup>-/<i>Venus</i></sup> , <i>Gpr30</i> <sup><i>Venus/Venus</i></sup> | 19    |
|                         |                                   | male                  | 10–18                             | sham                                                                                                              | 17    |
| Supplementary Fig. 9d   | C57BL/6J (The Jackson Laboratory) | male                  | 10–20                             | <i>Gpr30</i> <sup>+/+</sup> , <i>Gpr30</i> <sup>+/<i>Venus</i></sup>                                              | 21    |
|                         |                                   | male                  | 10–20                             | <i>Gpr30</i> <sup>-/-</sup> , <i>Gpr30</i> <sup>-/<i>Venus</i></sup> , <i>Gpr30</i> <sup><i>Venus/Venus</i></sup> | 18    |
|                         |                                   | male                  | 10–18                             | sham                                                                                                              | 13    |
| Supplementary Fig. 9e   | C57BL/6J (The Jackson Laboratory) | male                  | 10–20                             | <i>Gpr30</i> <sup>+/+</sup> , <i>Gpr30</i> <sup>+/<i>Venus</i></sup>                                              | 21    |
|                         |                                   | male                  | 10–20                             | <i>Gpr30</i> <sup>-/-</sup> , <i>Gpr30</i> <sup>-/<i>Venus</i></sup> , <i>Gpr30</i> <sup><i>Venus/Venus</i></sup> | 18    |
|                         |                                   | male                  | 10–18                             | sham                                                                                                              | 13    |
| Supplementary Fig. 9f   | C57BL/6J (The Jackson Laboratory) | male                  | 10–20                             | <i>Gpr30</i> <sup>+/+</sup> , <i>Gpr30</i> <sup>+/<i>Venus</i></sup>                                              | 23    |
|                         |                                   | male                  | 10–20                             | <i>Gpr30</i> <sup>-/-</sup> , <i>Gpr30</i> <sup>-/<i>Venus</i></sup> , <i>Gpr30</i> <sup><i>Venus/Venus</i></sup> | 20    |
|                         |                                   | male                  | 10–18                             | sham                                                                                                              | 17    |
| Supplementary Fig. 10a  | C57BL/6J (The Jackson Laboratory) | male                  | 7                                 | <i>Gpr30</i> <sup>+/+</sup>                                                                                       | 1     |
|                         |                                   | male                  | 7                                 | <i>Gpr30</i> <sup><i>Venus/Venus</i></sup>                                                                        | 1     |

|                               |                                            |      |    |                                     |   |
|-------------------------------|--------------------------------------------|------|----|-------------------------------------|---|
|                               | Jackson Laboratory)                        | male | 8  | <i>Gpr30</i> <sup>+/+</sup>         | 2 |
|                               |                                            | male | 8  | <i>Gpr30</i> <sup>-/-</sup>         | 2 |
|                               |                                            | male | 8  | <i>Gpr30</i> <sup>+/Venus</sup>     | 1 |
|                               |                                            | male | 8  | <i>Gpr30</i> <sup>Venus/Venus</sup> | 2 |
|                               |                                            | male | 9  | <i>Gpr30</i> <sup>+/+</sup>         | 1 |
|                               |                                            | male | 9  | <i>Gpr30</i> <sup>-/-</sup>         | 2 |
|                               |                                            | male | 11 | <i>Gpr30</i> <sup>+/Venus</sup>     | 2 |
|                               |                                            | male | 11 | <i>Gpr30</i> <sup>Venus/Venus</sup> | 1 |
| Supplem<br>entary<br>Fig. 10b | C57BL/6J<br>(The<br>Jackson<br>Laboratory) | male | 14 | <i>Gpr30</i> <sup>+/+</sup>         | 5 |
|                               |                                            | male | 14 | <i>Gpr30</i> <sup>-/-</sup>         | 3 |
|                               |                                            | male | 14 | <i>Gpr30</i> <sup>+/Venus</sup>     | 4 |
|                               |                                            | male | 14 | <i>Gpr30</i> <sup>Venus/Venus</sup> | 4 |
|                               |                                            | male | 15 | <i>Gpr30</i> <sup>+/+</sup>         | 1 |
|                               |                                            | male | 15 | <i>Gpr30</i> <sup>+/Venus</sup>     | 4 |
|                               |                                            | male | 15 | <i>Gpr30</i> <sup>Venus/Venus</sup> | 2 |
|                               |                                            | male | 16 | <i>Gpr30</i> <sup>+/Venus</sup>     | 3 |
|                               |                                            | male | 16 | <i>Gpr30</i> <sup>Venus/Venus</sup> | 2 |
| Supplem<br>entary<br>Fig. 10c | C57BL/6J<br>(The<br>Jackson<br>Laboratory) | male | 14 | <i>Gpr30</i> <sup>+/+</sup>         | 1 |
|                               |                                            | male | 14 | <i>Gpr30</i> <sup>-/-</sup>         | 1 |
|                               |                                            | male | 15 | <i>Gpr30</i> <sup>+/+</sup>         | 1 |
|                               |                                            | male | 15 | <i>Gpr30</i> <sup>-/-</sup>         | 1 |
|                               |                                            | male | 18 | <i>Gpr30</i> <sup>+/+</sup>         | 2 |
|                               |                                            | male | 18 | <i>Gpr30</i> <sup>-/-</sup>         | 3 |
|                               |                                            | male | 20 | <i>Gpr30</i> <sup>+/+</sup>         | 1 |
|                               |                                            | male | 20 | <i>Gpr30</i> <sup>-/-</sup>         | 1 |

## Source Data of Supplementary Figures

Uncropped blots of Supplementary Fig. 3a

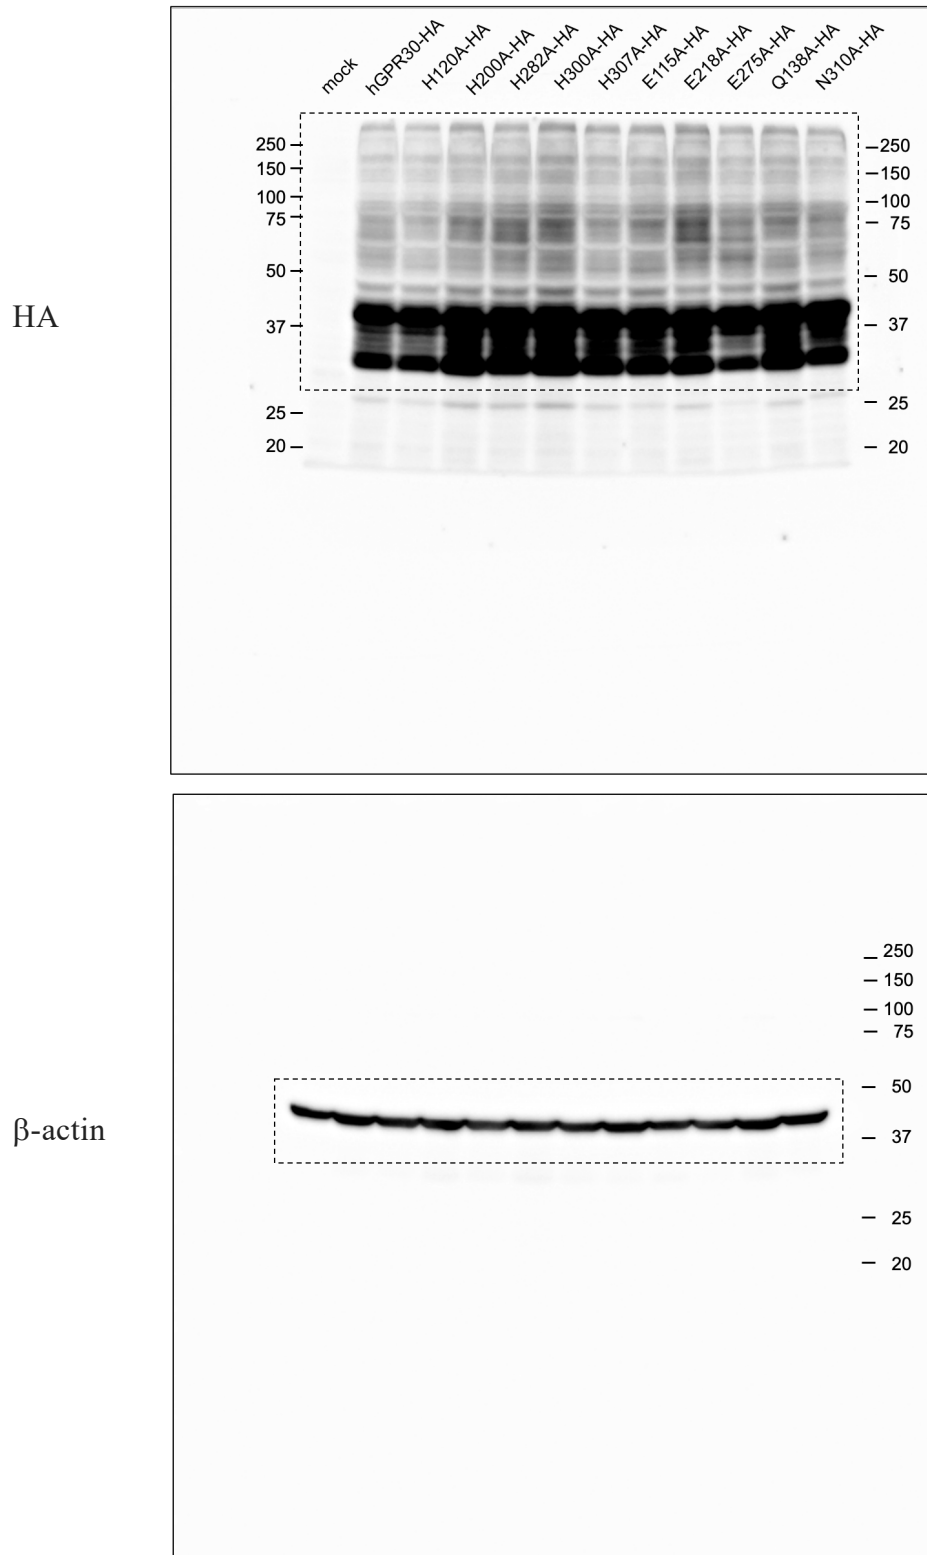

Uncropped blots of Supplementary Fig. 3b

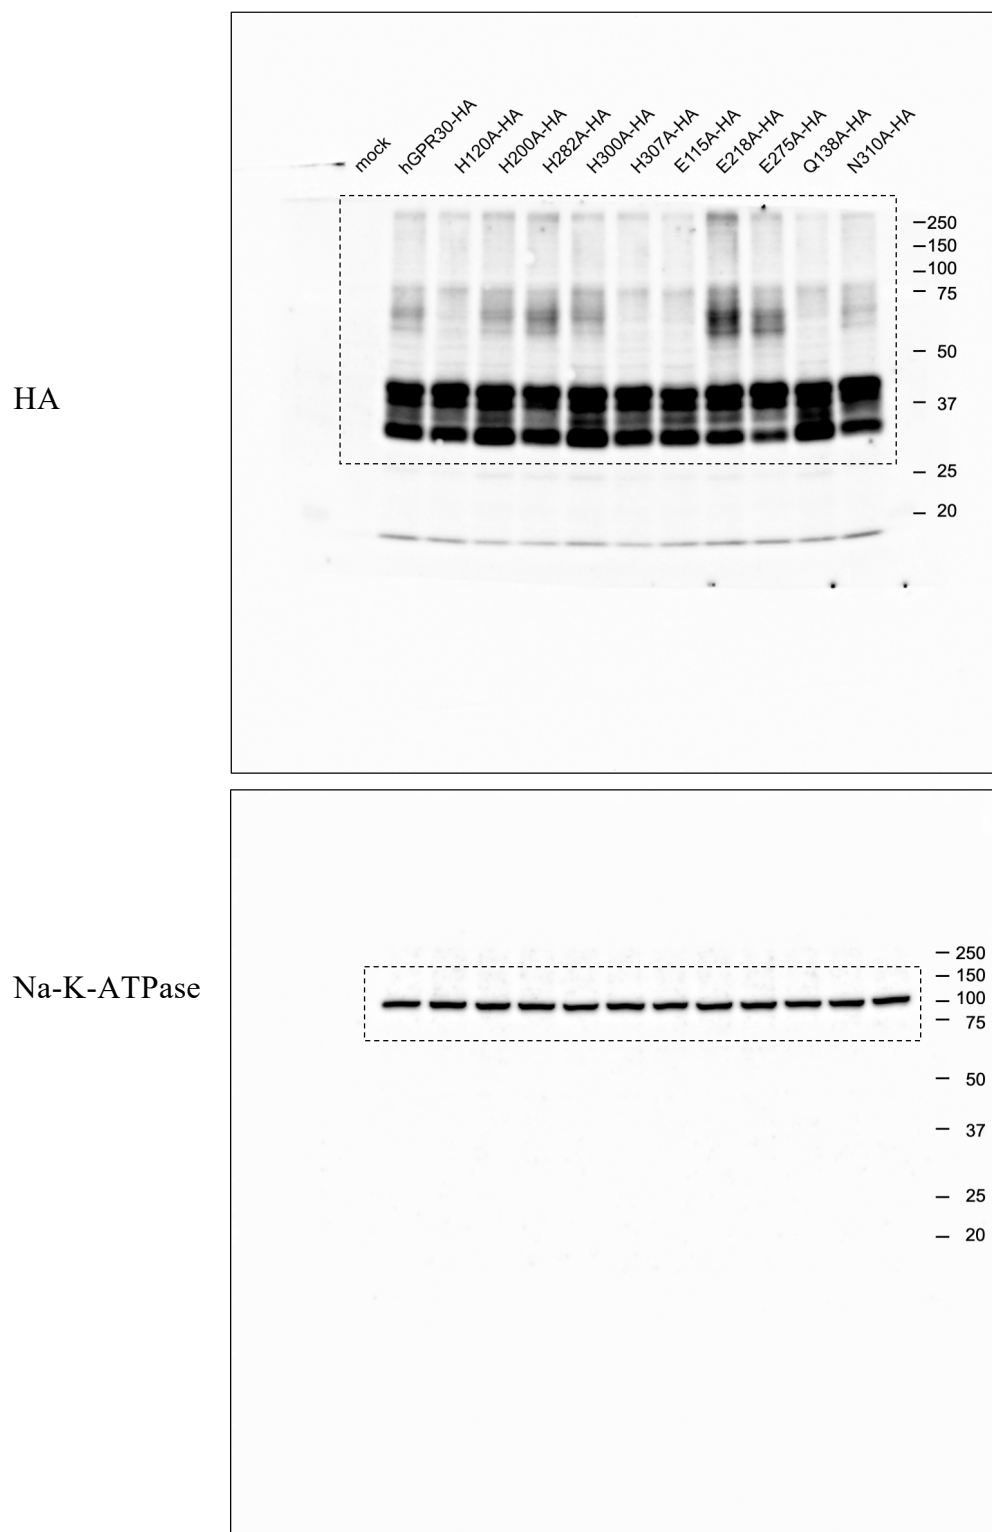

Uncropped blots of Supplementary Fig. 3c

HA

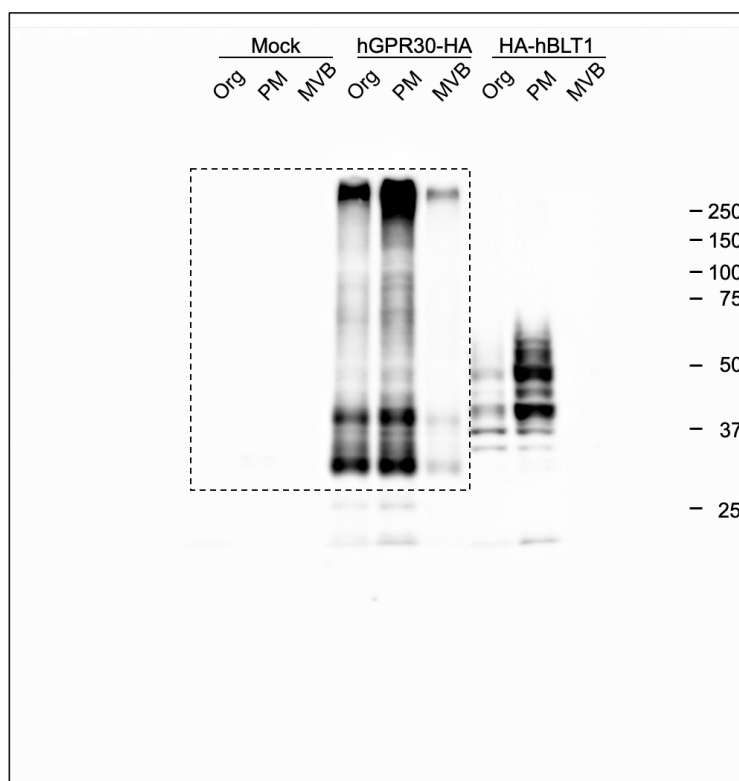

Na-K-ATPase

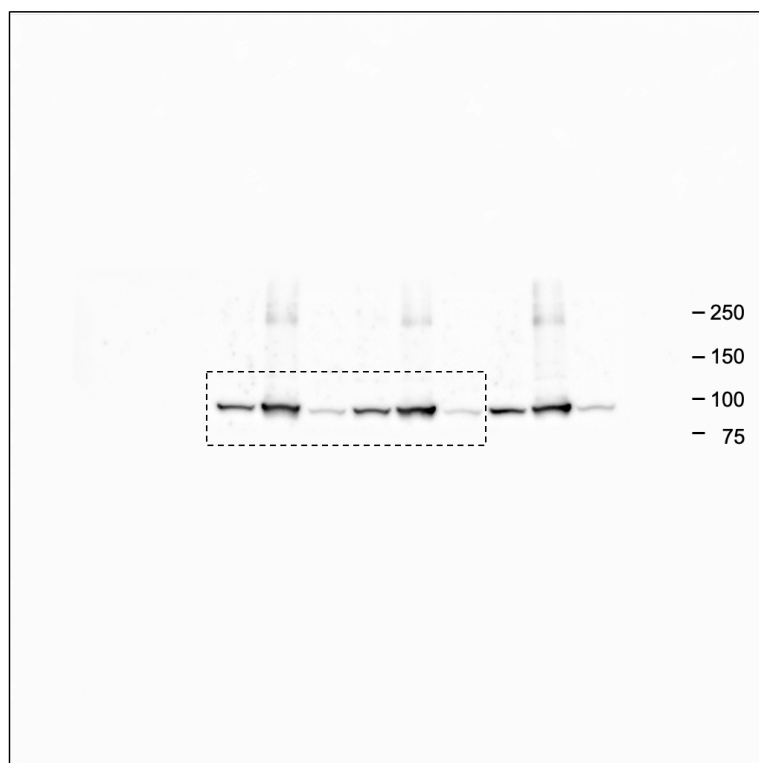



Uncropped blots of Supplementary Fig. 7a

Neuron-specific  $\beta$ III tubulin

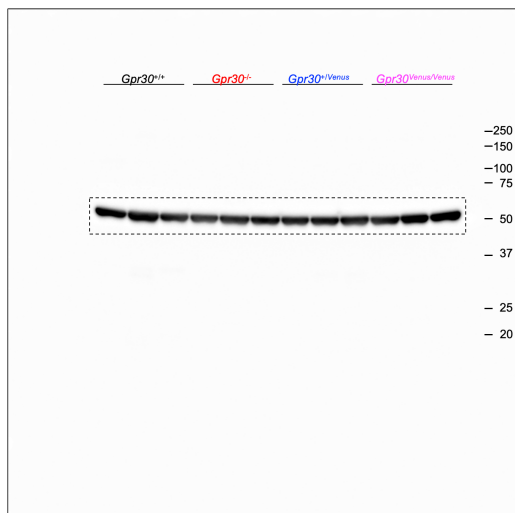

reprobe:  $\beta$ -actin

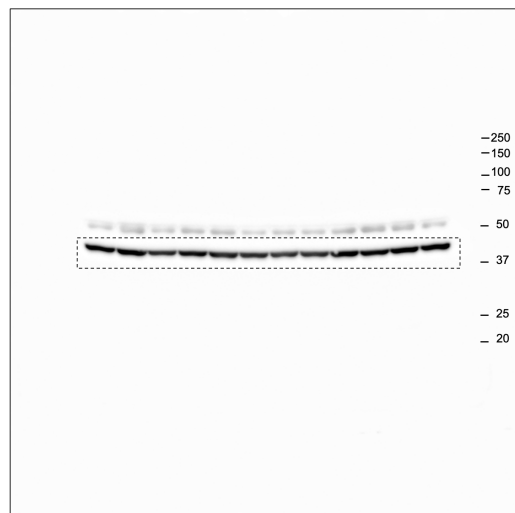

GAD-67

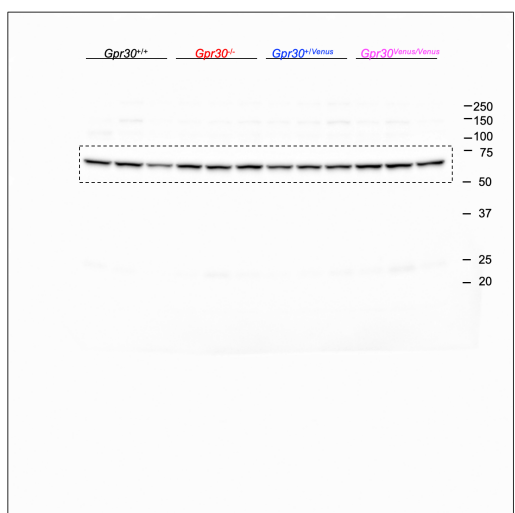

reprobe:  $\beta$ -actin

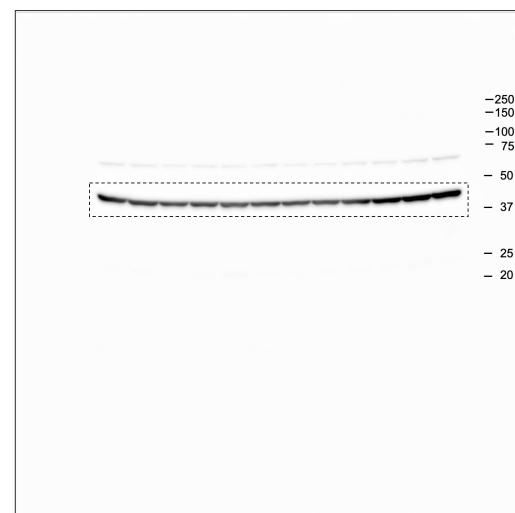

### Synaptophysin

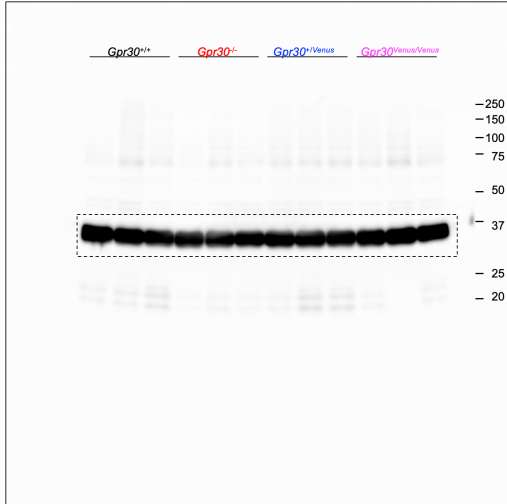

### reprobe: $\beta$ -actin

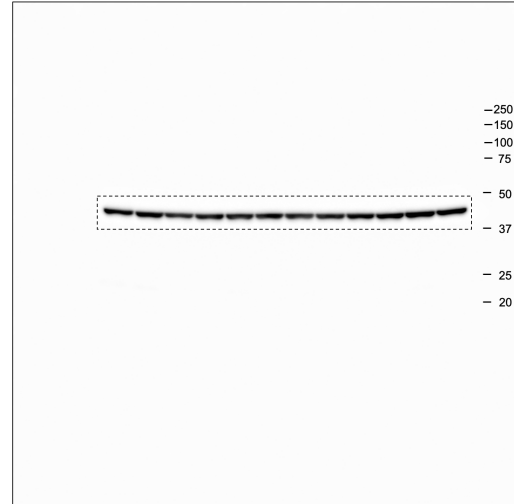

### PSD-95

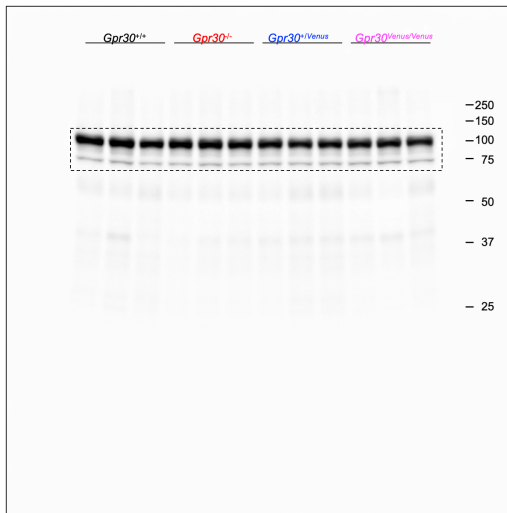

### reprobe: $\beta$ -actin

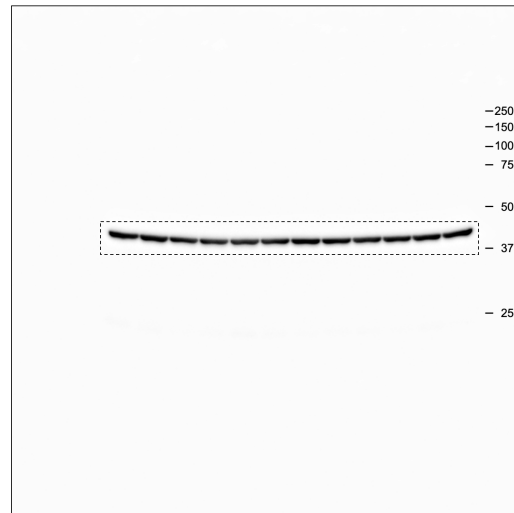

GFAP

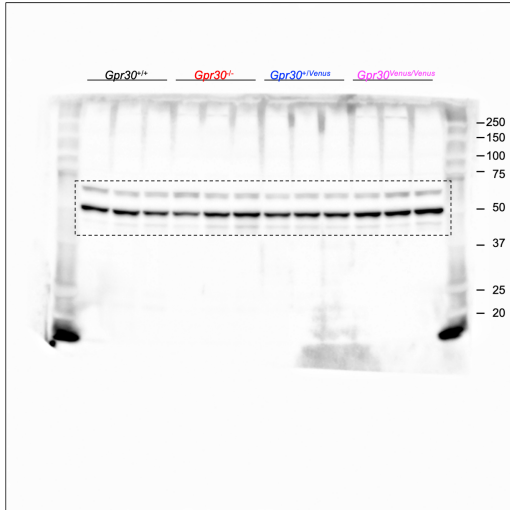

reprobe:  $\beta$ -actin

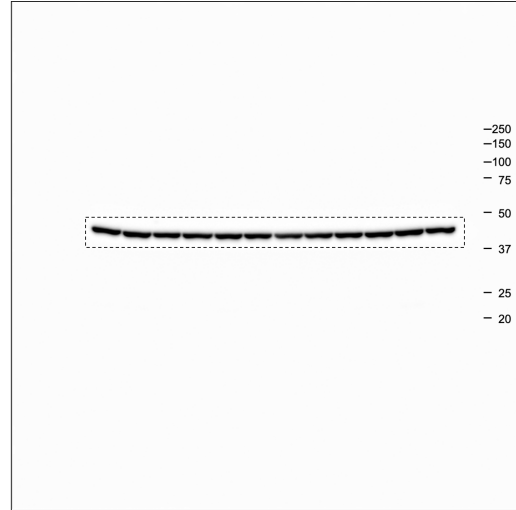

Uncropped blots of Supplementary Fig. 7b

Neuron-specific  $\beta$ III tubulin

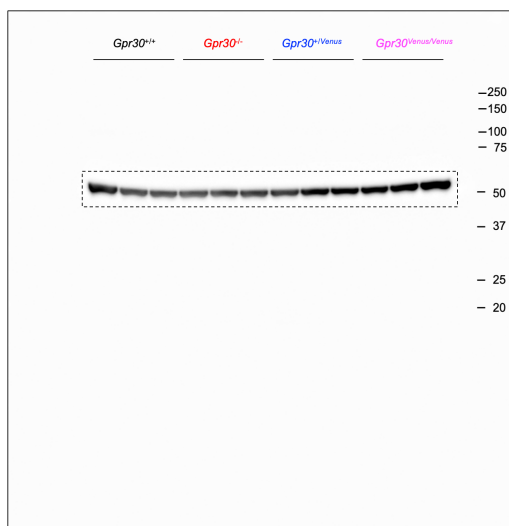

reprobe:  $\beta$ -actin

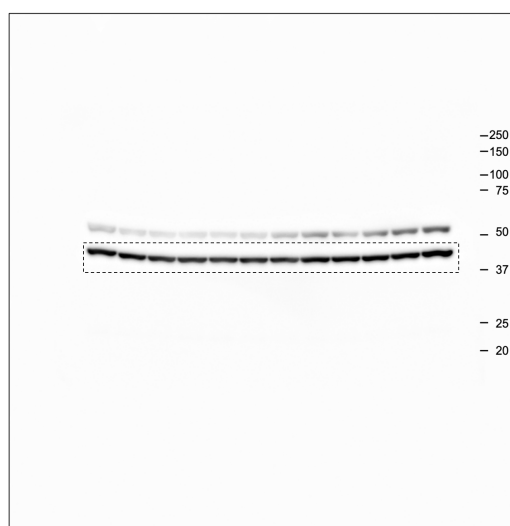

GAD-67

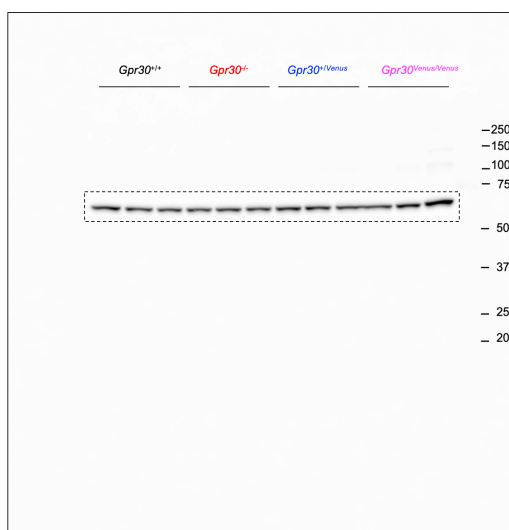

reprobe:  $\beta$ -actin

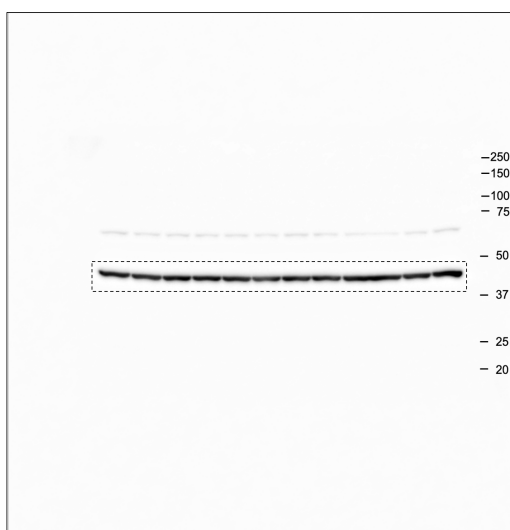

## Synaptophysin

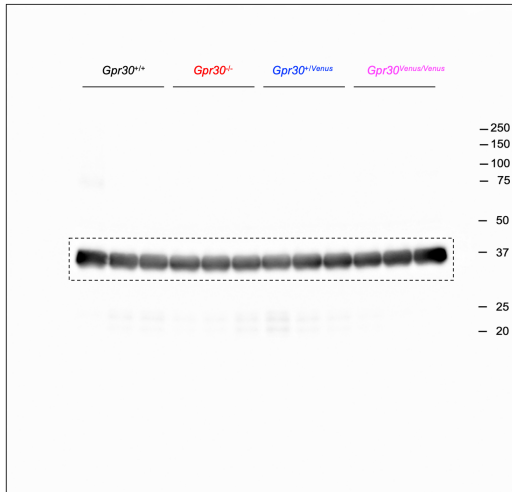

## reprobe: $\beta$ -actin

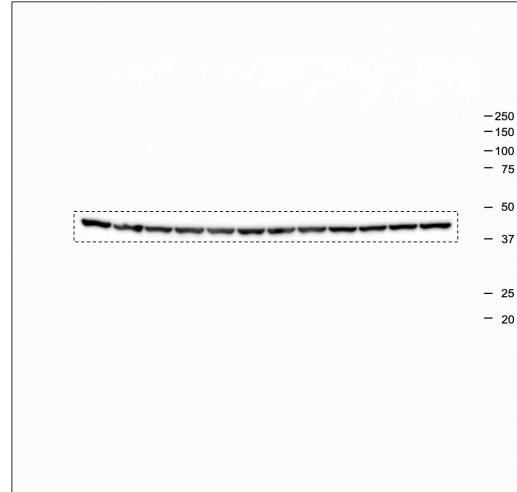

## PSD-95

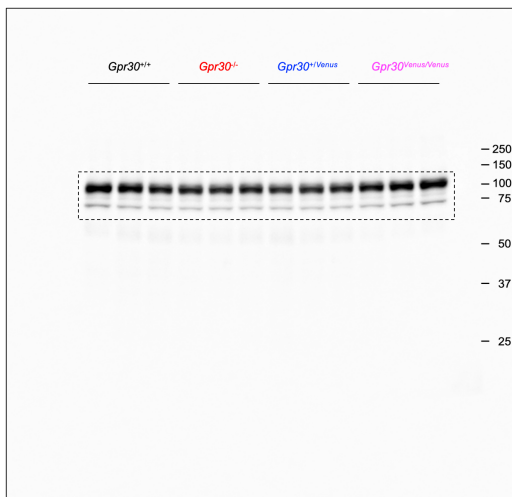

## reprobe: $\beta$ -actin

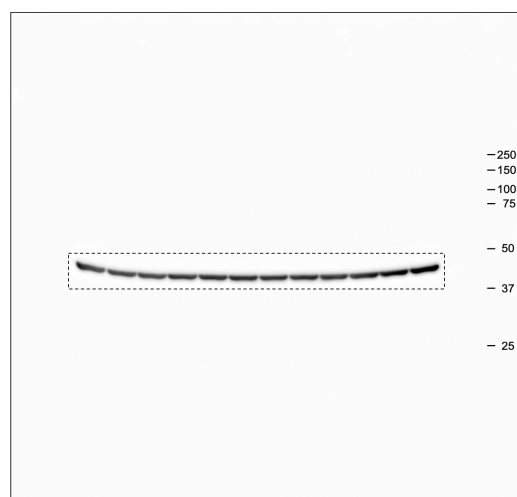

GFAP

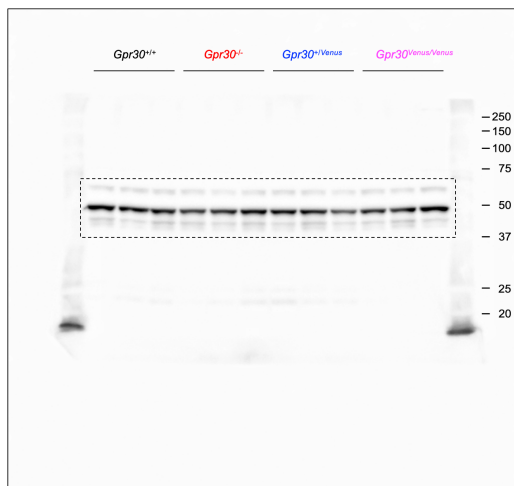

reprobe:  $\beta$ -actin

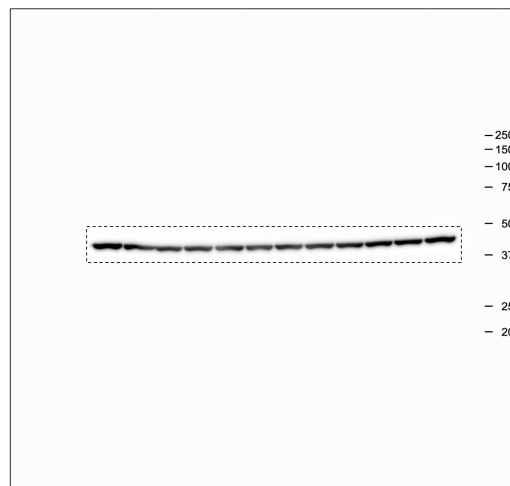

Supplement: 41467_2024_45579_MOESM1_ESM.pdf [file 41467_2024_45579_MOESM1_ESM.pdf]
